# Supplementary material
Source: MDPI journal article supplement (https://www.mdpi.com/1424-8247/15/5/641)
Supplement: s1 [file s1]

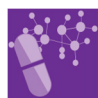

# Possible Mechanisms Underlying the Antispasmodic, Bronchodilator, and Antidiarrheal Activities of Polarity-Based Extracts of *Cucumis sativus* L. Seeds in In Silico, In Vitro, and In Vivo Studies

Muqeeet Wahid <sup>1</sup>, Fatima Saqib <sup>1\*</sup>, Saeed Akhtar <sup>2</sup>, Anam Ali <sup>1</sup>, Polrat Wilairatana <sup>3,\*</sup>, Mohammad S. Mubarak <sup>4,\*</sup>

<sup>1</sup> Department of Pharmacology, Faculty of Pharmacy, Bahauddin Zakariya University, Multan 60000, Pakistan; muqeeetsoomro@msn.com (M.W.); fatima.saqib@bzu.edu.pk (F.S.); anam.ali@live.in (A.A.)

<sup>2</sup> Institute of Food Science and Nutrition, Bahauddin Zakariya University, Multan (60000) Pakistan; saeedbzu@yahoo.com (S.A.);

<sup>3</sup> Department of Clinical Tropical Medicine, Faculty of Tropical Medicine, Mahidol University, Bangkok 10400, Thailand

<sup>4</sup> Department of Chemistry, The University of Jordan, Amman 11942, Jordan; mmubarak@ju.edu.jo (M.S.M)

\* Correspondence: fatima.saqib@bzu.edu.pk (F.S.); polrat.wil@mahidol.ac.th (P.W); mmubarak@ju.edu.jo (M.S.M)

**Table S1.** Identification of bioactive compounds in sequential seed extracts of *Cucumis sativus* L corresponding to chromatographic fragments by LC ESI–MS/MS

| Sequential Extracts | Rt (min) | Molecular Weight | Observed MS (m/z) | Calculated MS (m/z) | Error (ppm) | Precursor type                      | ESI–IT MS/MS (Ions)                                              | Empirical formula                               | Proposed compound                      | Class                               |
|---------------------|----------|------------------|-------------------|---------------------|-------------|-------------------------------------|------------------------------------------------------------------|-------------------------------------------------|----------------------------------------|-------------------------------------|
| Hexane              | 0.89     | 304.46           | 311.3342          | 311.3335            | −2.2        | [M−H] <sup>−</sup>                  | 311, 221, 184, 119                                               | C <sub>20</sub> H <sub>32</sub> O <sub>2</sub>  | Arachidic acid                         | Fatty acids                         |
|                     | 0.96     | 278.4            | 279.2325          | 279.2320            | −1.8        | [M−H] <sup>−</sup>                  | 279.25, 261.25, 259.17, 247.08, 243.17                           | C <sub>18</sub> H <sub>30</sub> O <sub>2</sub>  | Linoleic acid                          | Polyunsaturated fatty acid; omega−6 |
|                     | 6.2      | 256.42           | 255.2325          | 255.2322            | −1.2        | [M−H] <sup>−</sup>                  | 255, 235, 217, 181                                               | C <sub>16</sub> H <sub>32</sub> O <sub>2</sub>  | Palmitic acid                          | Fatty acid                          |
|                     | 21.4     | 228.37           | 227.2018          | 227.2021            | 1.3         | [M−H] <sup>−</sup>                  | 227, 209, 67                                                     | C <sub>14</sub> H <sub>28</sub> O <sub>2</sub>  | Myristic acid                          | Fatty acids                         |
|                     | 22.6     | 430.71           | 431.3878          | 431.3884            | 1.2         | [M + H] <sup>+</sup>                | 432, 430, 205, 166, 165, 136,                                    | C <sub>29</sub> H <sub>50</sub> O <sub>2</sub>  | α-tocopherol                           | Fat-soluble vitamin                 |
| DCM                 | 0.83     | 414.7            | 413.3785          | 413.3781            | −1.0        | [M−H] <sup>−</sup>                  | 412.08, 391.33, 365.33, 352.33, 311.25, 297, 285.08, 255.08, 171 | C <sub>29</sub> H <sub>50</sub> O               | β-sitosterol                           | Phytosterols                        |
|                     | 1.62     | 162.14           | 161.0252          | 161.0249            | −1.9        | [M−H] <sup>−</sup>                  | 161, 133, 117,                                                   | C <sub>9</sub> H <sub>6</sub> O <sub>3</sub>    | Umbelliferone                          | Hydroxycoumarins                    |
|                     | 1.65     | 173.21           | 172.0971          | 172.0973            | 1.2         | [M−H] <sup>−</sup>                  | 130, 172                                                         | C <sub>8</sub> H <sub>15</sub> NO <sub>3</sub>  | N-Acetyl-leucine                       | Amino acids and derivatives         |
|                     | 1.78     | 180.16           | 179.0349          | 179.0347            | −1.1        | [M−H] <sup>−</sup>                  | 179.17, 172, 161.17, 135,                                        | C <sub>9</sub> H <sub>8</sub> O <sub>4</sub>    | Caffeic acid                           | Hydroxycinnamic acids               |
|                     | 3.84     | 412.69           | 413.8479          | 413.8482            | 0.7         | [M+H] <sup>+</sup>                  | 397, 379, 355, 342.1, 297,                                       | C <sub>29</sub> H <sub>48</sub> O               | Stigmasterol                           | Sterol                              |
|                     | 3.86     | 400.68           | 383.4012          | 383.4009            | −0.8        | [M−H <sub>2</sub> O+H] <sup>+</sup> | 383.4, 161, 135                                                  | C <sub>28</sub> H <sub>48</sub> O               | Campesterol                            | Sterol; Ergosterols and derivatives |
|                     | 4.3      | 346.37           | 345.031           | 345.0312            | 0.6         | [M−H] <sup>−</sup>                  | 345.52, 300, 226, 221, 206                                       | C <sub>19</sub> H <sub>22</sub> O <sub>6</sub>  | Gibberellin A3                         | Diterpenoids                        |
|                     | 4.32     | 317.5            | 318.3018          | 318.3022            | 1.3         | [M+H] <sup>+</sup>                  | 318.3, 300.29, 270, 264, 252, 60                                 | C <sub>18</sub> H <sub>39</sub> NO <sub>3</sub> | Phytosphingosine                       | Sphingolipids                       |
| Ethanol             | 3.4      | 458.37           | 457.0756          | 457.0749            | −1.5        | [M−H] <sup>−</sup>                  | 305, 169, 125                                                    | C <sub>22</sub> H <sub>18</sub> O <sub>11</sub> | Epigallocatechin gallate               | Catechins                           |
|                     | 3.96     | 463.4            | 463.0882          | 463.0892            | 2.2         | [M−H] <sup>−</sup>                  | 463, 301, 271, 179, 151                                          | C <sub>21</sub> H <sub>19</sub> O <sub>12</sub> | Quercetin−3−O−glucoside                | Flavonoid                           |
|                     | 4.2      | 624.54           | 623.1618          | 623.1615            | −0.5        | [[M−H] <sup>−</sup>                 | 623,315, 300, 271, 285, 151                                      | C <sub>28</sub> H <sub>32</sub> O <sub>16</sub> | Narcissin /Isorhamnetin 3−O−Rutinoside | Flavonoid glycosides                |
|                     | 4.28     | 178.18           | 383.4017          | 383.4012            | −1.3        | [M−H] <sup>−</sup>                  | 177, 135, 133, 119                                               | C <sub>10</sub> H <sub>10</sub> O <sub>3</sub>  | 4−Methoxycinnamic acid                 | Cinnamic acids                      |
|                     | 4.34     | 478.4            | 477.1038          | 477.1034            | −0.8        | [M−H] <sup>−</sup>                  | 477,314, 299, 285, 271, 243,151                                  | C <sub>22</sub> H <sub>22</sub> O <sub>12</sub> | Isorhamnetin−3−O−glucoside             | Flavonoid glycosides                |
|                     | 4.63     | 192.17           | 191.0357          | 191.0355            | −1.0        | [M−H] <sup>−</sup>                  | 192, 191, 176, 148, 137, 104                                     | C <sub>10</sub> H <sub>8</sub> O <sub>4</sub>   | Scopoletin                             | Hydroxycoumarins                    |
|                     | 4.7      | 432.38           | 431.0984          | 431.099             | 1.4         | [M−H] <sup>−</sup>                  | 431, 285, 284, 255, 227, 183                                     | C <sub>21</sub> H <sub>20</sub> O <sub>10</sub> | Kaempferol−3−O−rhamnoside              | Flavonoid glycosides                |
|                     | 5.2      | 448.38           | 447.0933          | 447.0934            | 0.2         | [M−H] <sup>−</sup>                  | 445.25, 417.08, 327.17, 297, 269, 225, 179, 161, 133             | C <sub>21</sub> H <sub>20</sub> O <sub>11</sub> | Orientin                               | Flavone glucoside                   |
|                     | 6.45     | 290.27           | 289.0717          | 289.0719            | 0.7         | [M−H] <sup>−</sup>                  | 290, 289, 245, 179, 165.08, 151.25                               | C <sub>15</sub> H <sub>14</sub> O <sub>6</sub>  | Epicatechin                            | Catechin/ Flavonoids                |
|                     | 6.6      | 272.25           | 271.0632          | 271.0639            | 2.6         | [M−H] <sup>−</sup>                  | 271, 215, 177, 151, 119, 107                                     | C <sub>15</sub> H <sub>12</sub> O <sub>5</sub>  | Naringenin                             | Flavanone                           |
|                     | 7.1      | 286.24           | 285.042           | 285.0415            | −1.8        | [M−H] <sup>−</sup>                  | 285, 217, 175, 151, 133,107                                      | C <sub>15</sub> H <sub>10</sub> O <sub>6</sub>  | Luteolin                               | Flavones                            |
|                     | 8.8      | 302.19           | 300.9993          | 300.9989            | −1.3        | [M−H] <sup>−</sup>                  | 300.08, 283, 257.18,201, 207, 172                                | C <sub>14</sub> H <sub>6</sub> O <sub>8</sub>   | Ellagic acid                           | Tannins                             |

|         |       |         |          |          |      |                     |                                           |                                                 |                                                         |                                |
|---------|-------|---------|----------|----------|------|---------------------|-------------------------------------------|-------------------------------------------------|---------------------------------------------------------|--------------------------------|
| Aqueous | 15.51 | 302.23  | 301.0359 | 301.0354 | −1.7 | [M−H] <sup>−</sup>  | 301.08, 286, 273.08, 179, 151, 121,107    | C <sub>15</sub> H <sub>10</sub> O <sub>7</sub>  | Quercetin                                               | Flavonoid                      |
|         | 16.8  | 270.24  | 269.045  | 269.0455 | 1.9  | [[M−H] <sup>−</sup> | 269, 240, 225, 151, 117                   | C <sub>15</sub> H <sub>10</sub> O <sub>5</sub>  | Apigenin                                                | Flavonoids                     |
|         | 17.5  | 516.4   | 515.015  | 515.0130 | −0.4 | [M−H] <sup>−</sup>  | 471, 394, 353, 341 327.25, 317,           | C <sub>25</sub> H <sub>24</sub> O <sub>12</sub> | 1,4-Dicaffeoylquinic acid                               | Quinic acids                   |
|         | 0.75  | 504.437 | 503.1617 | 503.1615 | −0.4 | [M−H] <sup>−</sup>  | 485, 341, 221, 217 179, 161               | C <sub>18</sub> H <sub>32</sub> O <sub>16</sub> | Maltotriose                                             | Oligosaccharides               |
|         | 2.8   | 462.36  | 461.0783 | 461.0775 | −1.7 | [M−H] <sup>−</sup>  | 461, 285, 175, 151, 133,107               | C <sub>21</sub> H <sub>18</sub> O <sub>12</sub> | Luteolin 7−O glucuronide                                | Flavone glucuronide            |
|         | 2.91  | 356.32  | 355.1035 | 355.1042 | 2.0  | [M−H] <sup>−</sup>  | 355.1, 193, 178, 149.05, 101              | C <sub>16</sub> H <sub>20</sub> O <sub>9</sub>  | Feruloyl glucose                                        | Coumaric acids and derivatives |
|         | 4.09  | 594.52  | 447.0936 | 447.0934 | −0.4 | [M−H] <sup>−</sup>  | 593, 285, 151, 133, 107                   | C <sub>27</sub> H <sub>30</sub> O <sub>15</sub> | Luteolin 7−O−glucoside                                  | Flavonoid glycosides           |
|         | 4.11  | 462.36  | 461.073  | 461.0735 | 1.1  | [M−H] <sup>−</sup>  | 461, 285, 257, 229, 175, 113              | C <sub>21</sub> H <sub>18</sub> O <sub>12</sub> | Kaempferol−3−O−glucuronoside / Kaempferol 3−glucuronide | Flavonoid glycosides           |
|         | 4.28  | 448.38  | 447.0943 | 447.0938 | −1.1 | [M−H] <sup>−</sup>  | 447.09, 284, 285, 271, 284, 253, 179, 151 | C <sub>21</sub> H <sub>20</sub> O <sub>11</sub> | Kaempferol−3−O−glucoside                                | Flavonoid glycosides           |
|         | 6.3   | 270.24  | 269.0425 | 269.0434 | 3.3  | [M−H] <sup>−</sup>  | 241, 225, 197, 157, 133                   | C <sub>15</sub> H <sub>10</sub> O <sub>5</sub>  | Genistein                                               | Isoflavones                    |
|         | 7.3   | 134.09  | 133.0129 | 133.0128 | −0.8 | [M−H] <sup>−</sup>  | 132, 115, 71                              | C <sub>4</sub> H <sub>6</sub> O <sub>5</sub>    | Malic acid                                              | Carboxylic acid                |
|         | 7.4   | 196.16  | 195.0508 | 195.0503 | −2.6 | [M−H] <sup>−</sup>  | 75,99, 101,129, 159, 177                  | C <sub>6</sub> H <sub>12</sub> O <sub>7</sub>   | Gluconic Acid                                           | Sugar acids and derivatives    |
|         | 7.6   | 164.16  | 163.0428 | 163.0432 | 2.5  | [M−H] <sup>−</sup>  | 163.0, 119, 93, 65                        | C <sub>9</sub> H <sub>8</sub> O <sub>3</sub>    | p−coumaric acid                                         | Hydroxycinnamic acids          |
|         | 8.7   | 610.56  | 609.1817 | 609.1826 | 1.5  | [M−H] <sup>−</sup>  | 609, 486, 301, 285,242, 151               | C <sub>28</sub> H <sub>34</sub> O <sub>15</sub> | Hesperidin                                              | Flavonoid glycosides           |
|         | 9.9   | 194.18  | 193.0509 | 193.0512 | 1.6  | [M−H] <sup>−</sup>  | 193, 178, 149, 134                        | C <sub>10</sub> H <sub>10</sub> O <sub>4</sub>  | Isoferulic acid                                         | Cinnamic acids                 |
|         | 9.95  | 194.18  | 193.0505 | 193.0503 | −1.0 | [M−H] <sup>−</sup>  | 181, 164, 133, 118, 114.1, 104            | C <sub>10</sub> H <sub>10</sub> O <sub>4</sub>  | Ferulic acid                                            | Cinnamic acids                 |
|         | 16.7  | 286.23  | 285.0405 | 285.0406 | 0.4  | [M−H] <sup>−</sup>  | 286, 247, 227, 219, 209 151, 142.97, 117  | C <sub>15</sub> H <sub>10</sub> O <sub>6</sub>  | Kaempferol                                              | Flavanols                      |

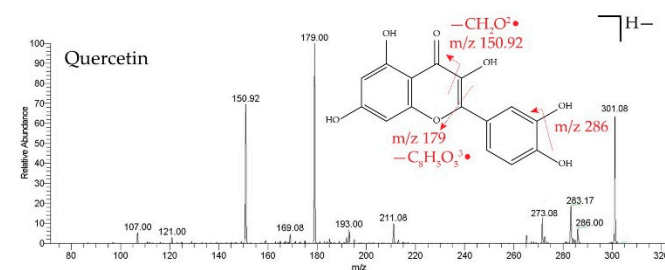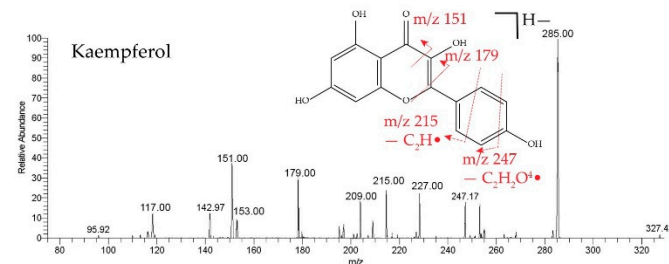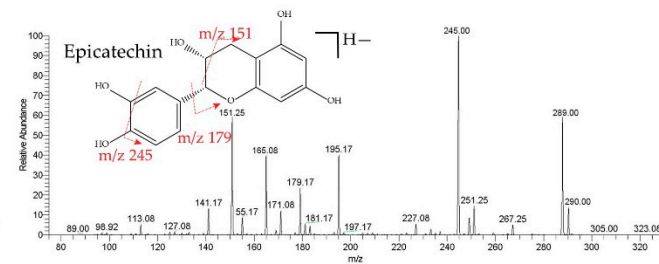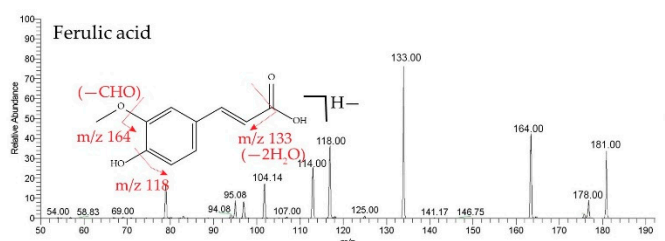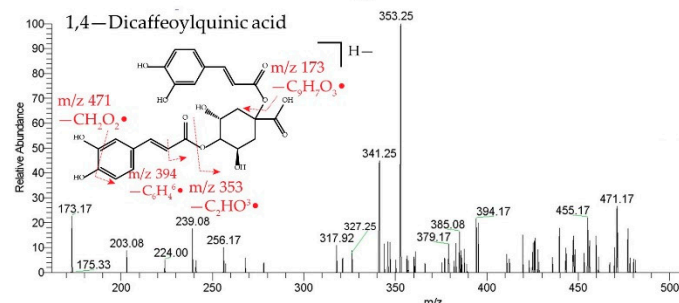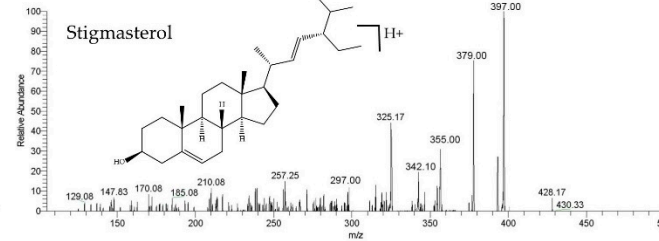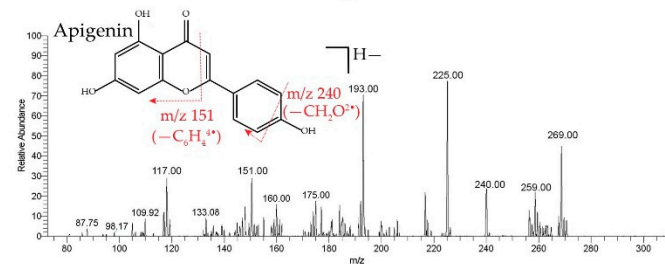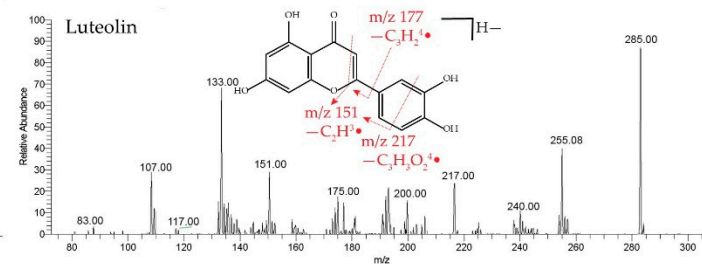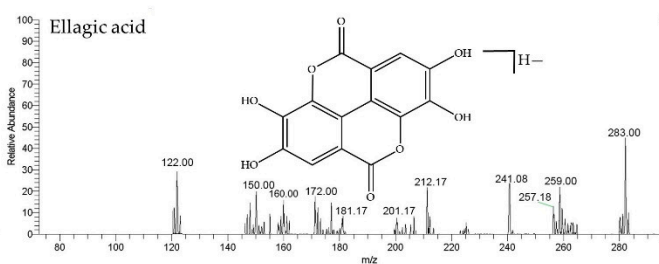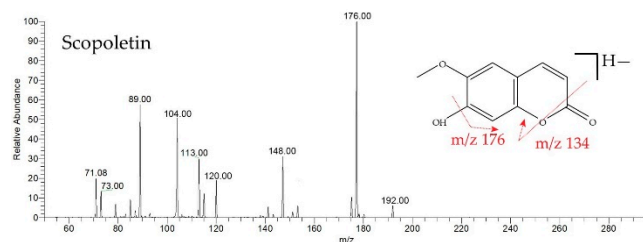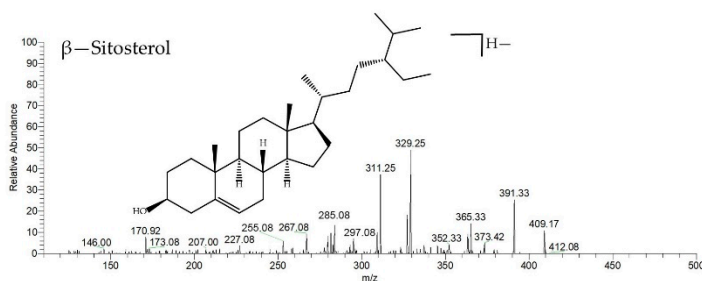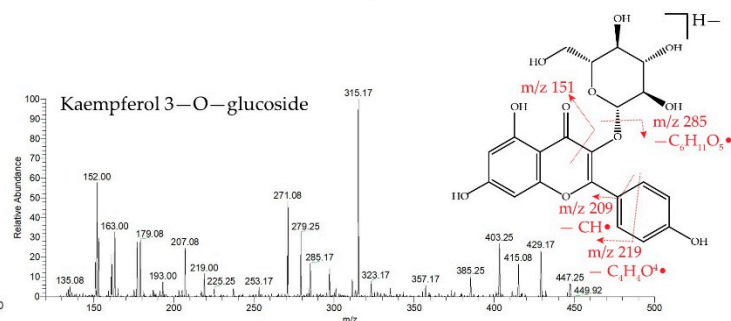

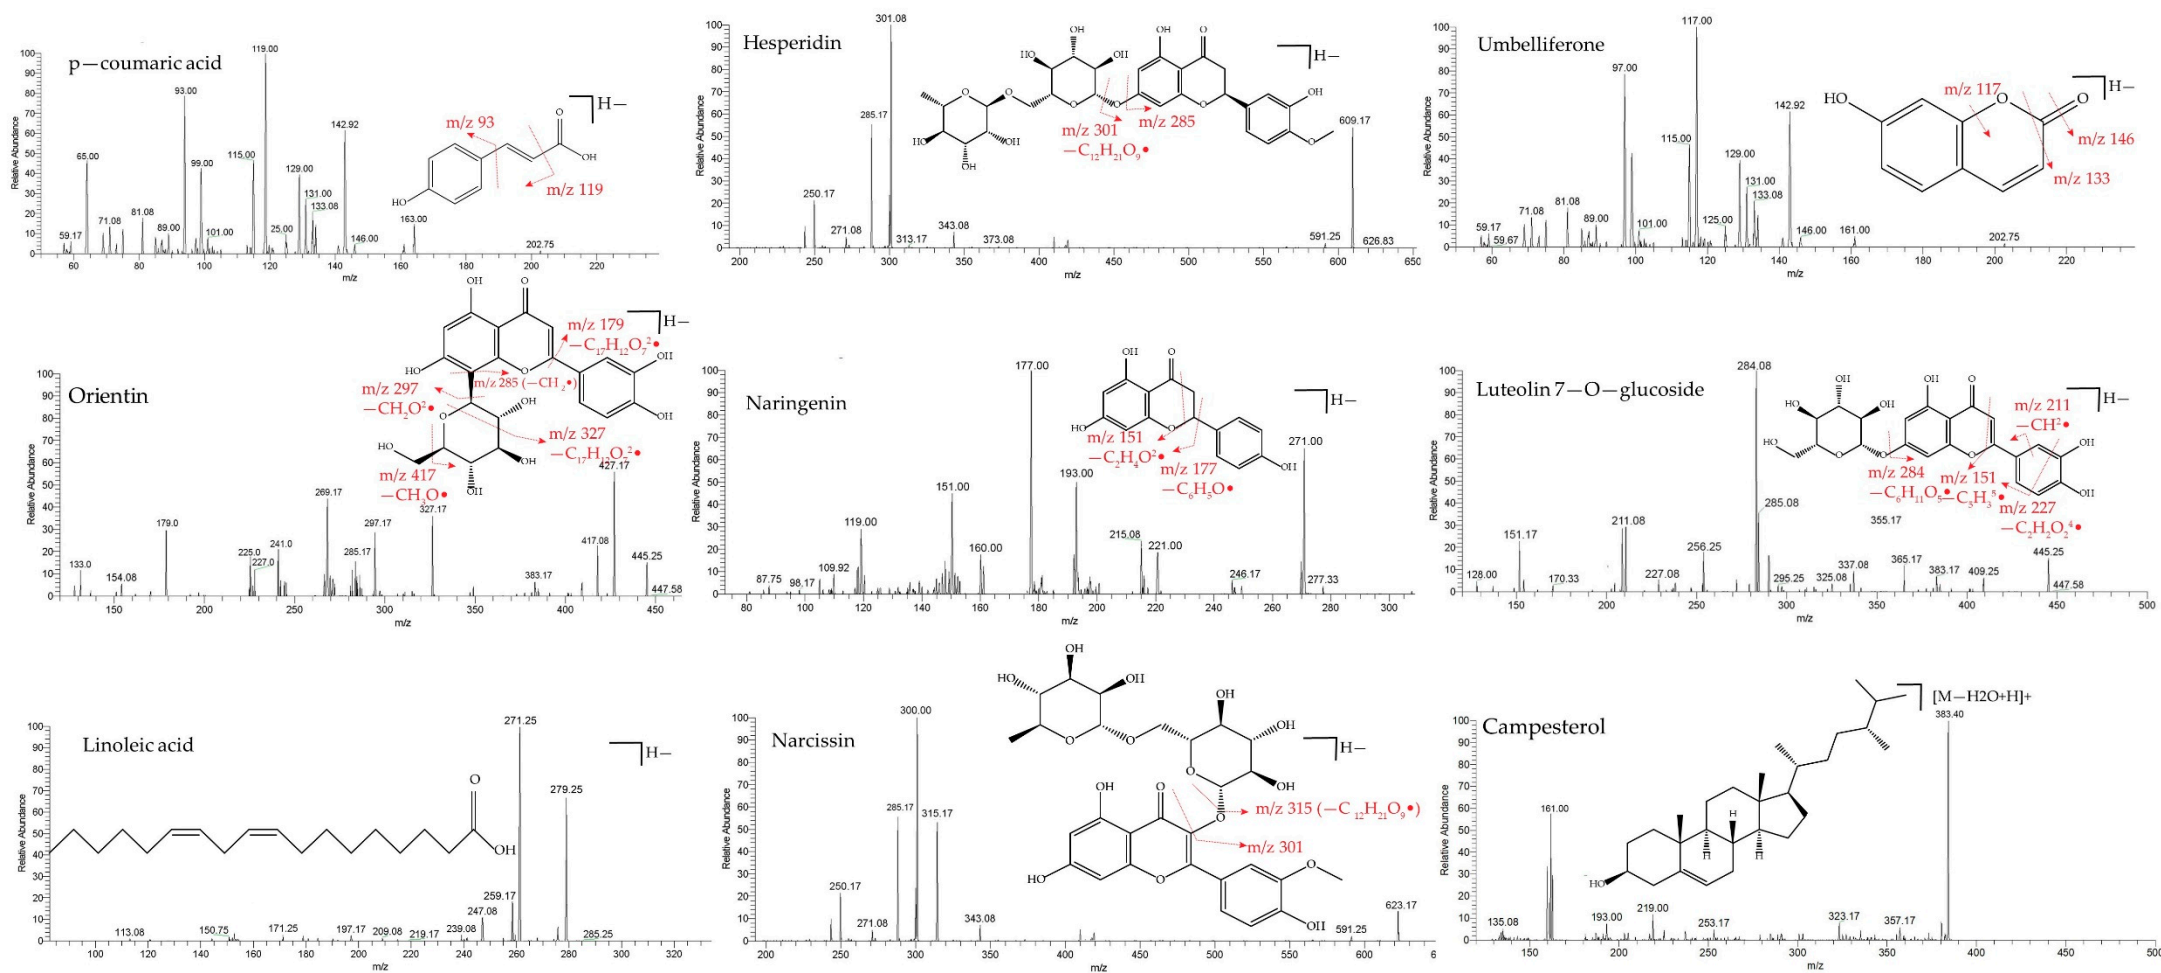

**Figure S1.** Negative and positive ESI-MS/MS spectra for putative chemicals of sequential seed extracts of *C. sativus*. Umbelliferone, stigmasterol, campesterol,  $\beta$ -sitosterol, epicatechin, scopoletin, ellagic acid, luteolin, orientin, 1,4-dicaffeoylquinic acid, narcissin, quercetin, kaempferol, apigenin, naringenin, p-coumaric acid, luteolin 7-O-glucoside, kaempferol 3-O-glucoside, ferulic acid, hesperidin, and linoleic acid.

**Table S2.** Quantification and method validation of bioactive compounds of sequential seed extracts of *Cucumis sativus* L

| Sequential Fractions | Analytes                  | $\lambda$ (nm) | Rt (mins) | Linear Regression Data     |                       |        | LOD ( $\mu\text{g/mL}$ ) | LOQ ( $\mu\text{g/mL}$ ) | Concentration ( $\mu\text{g/g}$ ) | Precision (RSD %) |           | Recovery          |      | Analytes + Extract ( $\mu\text{g/g}$ ) |                   |
|----------------------|---------------------------|----------------|-----------|----------------------------|-----------------------|--------|--------------------------|--------------------------|-----------------------------------|-------------------|-----------|-------------------|------|----------------------------------------|-------------------|
|                      |                           |                |           | Range ( $\mu\text{g/mL}$ ) | Equation              | $r^2$  |                          |                          |                                   | Inter Day         | Intra Day | Mean              | RSD% | 50 $\mu\text{g}$                       | 100 $\mu\text{g}$ |
| DCM                  | Umbelliferone             | 270            | 7.3       | 7.81–500                   | $y = 126.56x + 5.71$  | 0.9999 | 0.25                     | 0.74                     | 298.24                            | 1.95              | 0.74      | 99.62 $\pm$ 0.66  | 0.66 | 347.84                                 | 397.34            |
|                      | Stigmasterol              |                | 18.2      | 7.81–500                   | $y = 118.54x + 11.44$ | 0.9993 | 0.38                     | 1.16                     | 350.11                            | 0.70              | 1.11      | 100.40 $\pm$ 0.67 | 0.67 | 398.71                                 | 449.11            |
|                      | Campesterol               |                | 21.4      | 7.81–500                   | $y = 84.355x + 6.32$  | 0.9999 | 0.36                     | 1.09                     | 202.94                            | 0.57              | 2.20      | 99.72 $\pm$ 1.88  | 1.89 | 251.64                                 | 300.99            |
|                      | $\beta$ -sitosterol       |                | 19.5      | 7.81–500                   | $y = 78.358x + 5.34$  | 0.9998 | 0.22                     | 0.67                     | 317.42                            | 0.94              | 1.31      | 99.49 $\pm$ 0.72  | 0.72 | 360.14                                 | 416.92            |
| Ethanol              | Epicatechin               | 280            | 4.7       | 7.81–500                   | $y = 82.366x + 10.58$ | 0.9999 | 0.37                     | 1.13                     | 395.64                            | 0.93              | 1.42      | 99.78 $\pm$ 0.41  | 0.41 | 445.14                                 | 494.98            |
|                      | Scopoletin                |                | 5.4       | 7.81–500                   | $y = 142.37x + 9.57$  | 0.9999 | 0.20                     | 0.59                     | 323.91                            | 1.67              | 1.31      | 98.66 $\pm$ 0.86  | 0.87 | 372.93                                 | 42.41             |
|                      | Ellagic acid              |                | 7.4       | 7.81–500                   | $y = 62.387x + 6.79$  | 0.9999 | 0.51                     | 1.53                     | 598.81                            | 1.50              | 1.48      | 100.52 $\pm$ 1.90 | 1.89 | 648.11                                 | 698.31            |
|                      | Luteolin                  |                | 13.4      | 7.81–500                   | $y = 110.38x + 8.13$  | 0.9997 | 0.30                     | 0.92                     | 642.32                            | 1.54              | 1.42      | 99.84 $\pm$ 0.84  | 0.84 | 691.52                                 | 740.89            |
|                      | Orientin                  |                | 16.5      | 7.81–500                   | $y = 86.352x + 3.81$  | 0.9999 | 0.40                     | 1.20                     | 676.19                            | 1.31              | 1.21      | 100.52 $\pm$ 1.17 | 1.17 | 726.19                                 | 776.19            |
|                      | 1,4-Dicaffeoylquinic acid | 320            | 7.2       | 7.81–500                   | $y = 98.346x + 6.09$  | 0.9999 | 0.43                     | 1.31                     | 545.19                            | 0.75              | 1.06      | 99.19 $\pm$ 1.04  | 1.05 | 594.51                                 | 644.29            |
|                      | Narcissin                 |                | 12.5      | 7.81–500                   | $y = 102.36x + 4.06$  | 0.9997 | 0.30                     | 0.91                     | 681.87                            | 1.75              | 0.71      | 99.83 $\pm$ 0.95  | 0.95 | 730.89                                 | 781.13            |
|                      | Quercetin                 |                | 13.7      | 7.81–500                   | $y = 167.57x + 17.17$ | 0.9999 | 0.49                     | 1.47                     | 713.83                            | 0.60              | 0.67      | 100.42 $\pm$ 1.10 | 1.10 | 763.33                                 | 813.06            |
|                      | Apigenin                  |                | 17.7      | 7.81–500                   | $y = 86.374x + 10.47$ | 0.9993 | 0.38                     | 1.14                     | 625.97                            | 0.79              | 0.84      | 99.44 $\pm$ 1.66  | 1.67 | 675.74                                 | 725.31            |
| Aqueous              | Naringenin                |                | 18.6      | 7.81–500                   | $y = 132.32x + 12.58$ | 0.9994 | 0.54                     | 1.64                     | 518.51                            | 0.90              | 1.01      | 99.29 $\pm$ 0.93  | 0.94 | 567.71                                 | 618.05            |
|                      | p-coumaric acid           | 280            | 14.1      | 7.81–500                   | $y = 172.34x + 6.86$  | 0.9996 | 0.29                     | 0.89                     | 283.15                            | 1.66              | 0.46      | 99.88 $\pm$ 1.01  | 1.01 | 332.55                                 | 382.27            |
|                      | Luteolin 7-O-glucoside    |                | 14.4      | 7.81–500                   | $y = 135.80x + 11.17$ | 0.9995 | 0.55                     | 1.68                     | 426.02                            | 0.57              | 0.81      | 100.17 $\pm$ 1.18 | 1.18 | 475.21                                 | 525.41            |
|                      | Kaempferol                |                | 19.4      | 7.81–500                   | $y = 151.79x + 8.26$  | 0.9998 | 0.38                     | 1.16                     | 813.74                            | 1.48              | 1.61      | 99.54 $\pm$ 1.48  | 1.49 | 862.84                                 | 913.16            |
|                      | Ferulic acid              |                | 24.9      | 7.81–500                   | $y = 111.75x + 12.87$ | 0.9995 | 0.45                     | 1.38                     | 381.31                            | 1.96              | 1.17      | 100.07 $\pm$ 1.29 | 1.29 | 429.91                                 | 480.68            |
|                      | Kaempferol-3-O-glucoside  | 320            | 11.6      | 7.81–500                   | $y = 129.78x + 4.29$  | 0.9999 | 0.57                     | 1.72                     | 559.24                            | 1.50              | 0.57      | 99.87 $\pm$ 1.50  | 1.50 | 608.72                                 | 658.34            |
|                      | Hesperidin                |                | 17.2      | 7.81–500                   | $y = 155.6x + 5.70$   | 0.9999 | 0.43                     | 1.29                     | 617.45                            | 1.61              | 1.02      | 99.32 $\pm$ 0.41  | 0.41 | 667.07                                 | 716.89            |

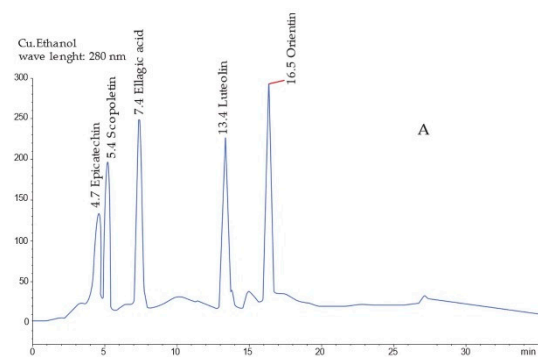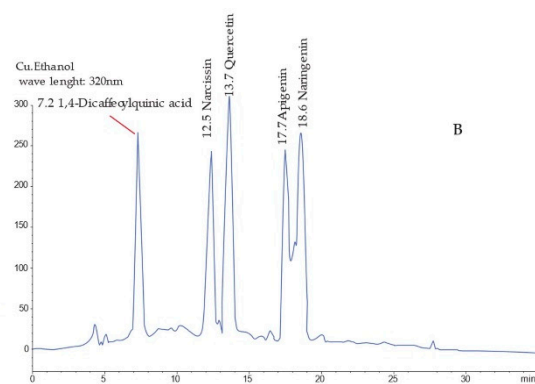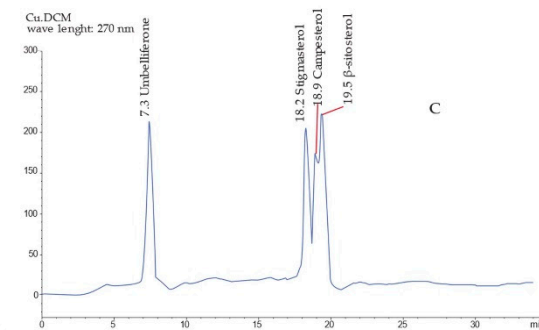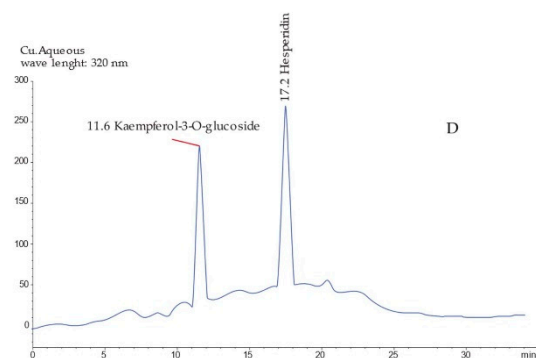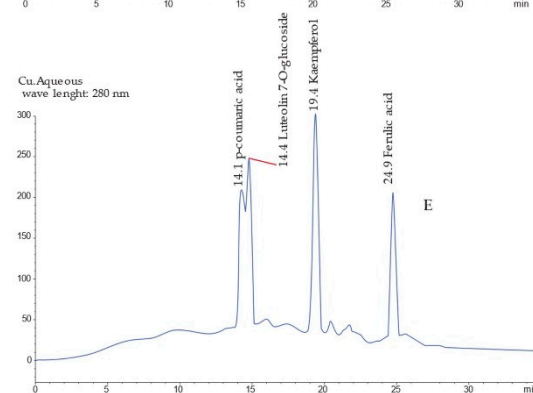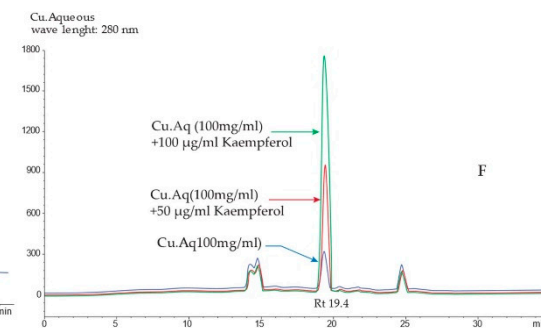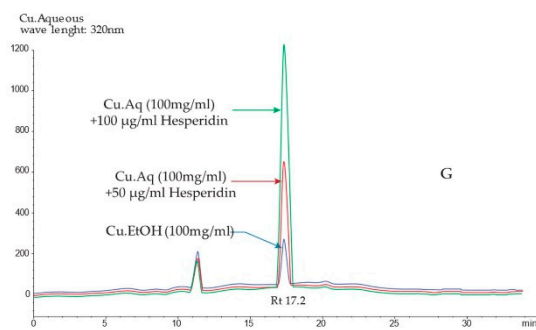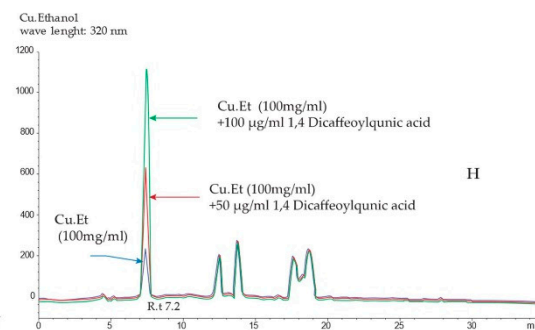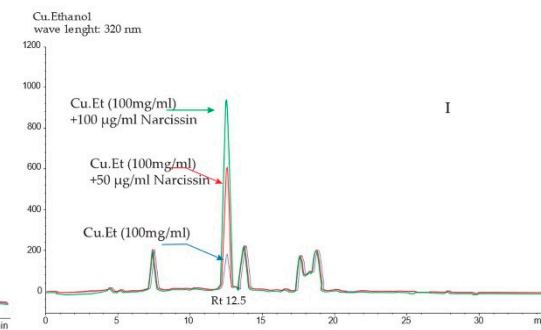

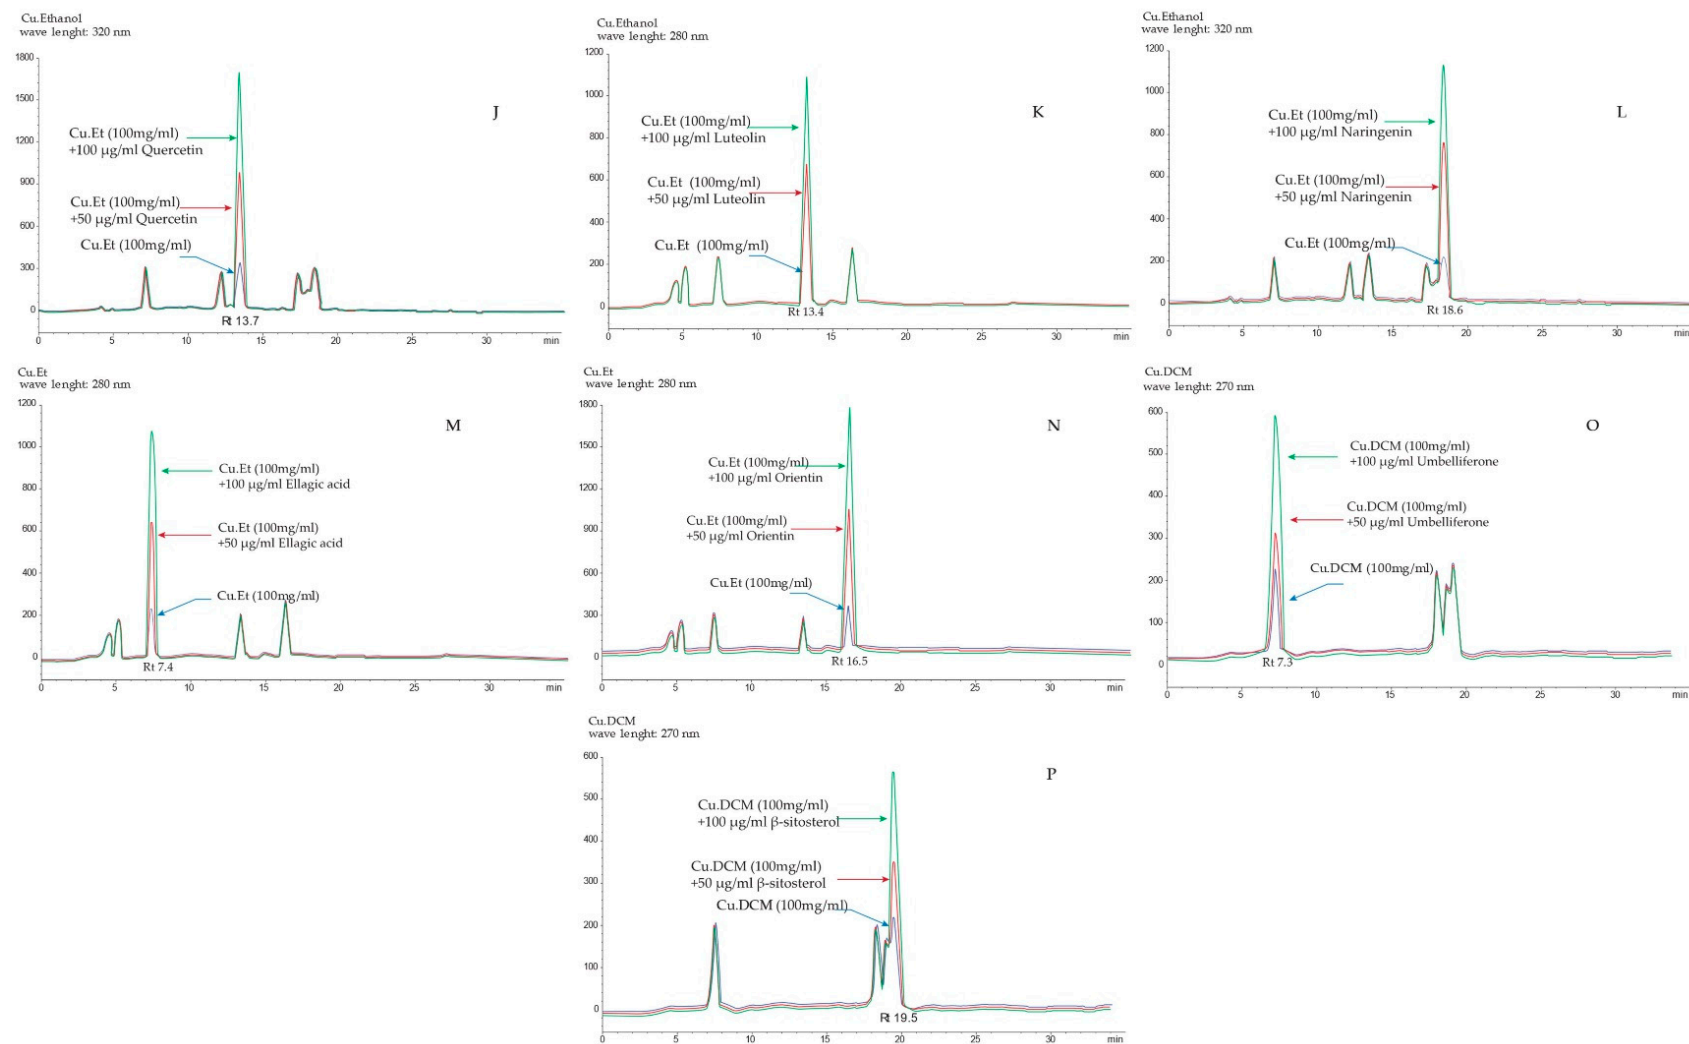

**Figure S2.** RP-HPLC chromatograms of sequential *C. sativus* seed extracts at different wavelengths and chromatograms of bioactive components confirmed by standard addition. The HPLC chromatograms of ethanol extract (A) revealed epicatechin, scopoletin, ellagic acid, luteolin, and orientin at 280 nm. (B) showed 1,4-dicaffeoylquinic acid, narcissin, quercetin, apigenin, and naringenin at 320 nm. The HPLC chromatograms of DCM extract (C) revealed umbelliferone, stigmasterol, campesterol, and  $\beta$ -sitosterol at 270 nm. The



---

HPLC chromatograms of aqueous extract (**D**) showed kaempferol-3-O-glucoside and hesperidin at 320 nm. (**E**) revealed *p*-coumaric acid, luteolin 7-O-glucoside, kaempferol, and ferulic acid at 280 nm. The external standard addition chromatograms for (**F**) kaempferol, (**G**) hesperidin, (**H**) 1,4-dicaffeoylquinic acid, (**I**) narcissin, (**J**) quercetin, (**K**) luteolin, (**L**) naringenin, (**M**) ellagic acid, (**N**) orientin, (**O**) umbelliferone and (**P**)  $\beta$ -sitosterol.

**Table S3. Precision validation of analytical method *C. sativus* sequential extracts**

| Analytes                  | Theoretical concentration (µg/ mL) | Inter-day precision ( <i>n</i> = 5) |       | Intra-day precision ( <i>n</i> =5) |       |
|---------------------------|------------------------------------|-------------------------------------|-------|------------------------------------|-------|
|                           |                                    | Measured concentration (µg/ mL)     | RSD % | Measured concentration (µg/mL)     | RSD % |
| Umbelliferone             | 100                                | 99.61±1.94                          | 1.95  | 99.90±0.74                         | 0.74  |
| Stigmasterol              | 100                                | 98.45±0.69                          | 0.70  | 98.82±1.10                         | 1.11  |
| Campesterol               | 100                                | 98.28±0.56                          | 0.57  | 98.30±2.16                         | 2.20  |
| β-sitosterol              | 100                                | 98.73±0.92                          | 0.94  | 98.91±1.30                         | 1.31  |
| Epicatechin               | 100                                | 98.41±0.91                          | 0.93  | 98.08±1.39                         | 1.42  |
| Scopoletin                | 100                                | 99.13±1.66                          | 1.67  | 98.74±1.29                         | 1.31  |
| Ellagic acid              | 100                                | 99.17±1.48                          | 1.50  | 98.97±1.47                         | 1.48  |
| Luteolin                  | 100                                | 99.11±1.52                          | 1.54  | 98.71±1.40                         | 1.42  |
| Orientin                  | 100                                | 98.76±1.30                          | 1.31  | 98.84±1.20                         | 1.21  |
| 1,4-Dicaffeoylquinic acid | 100                                | 99.08±0.74                          | 0.75  | 98.36±1.04                         | 1.06  |
| Narcissin                 | 100                                | 98.29±1.72                          | 1.75  | 99.00±0.71                         | 0.71  |
| Quercetin                 | 100                                | 99.02±0.59                          | 0.60  | 99.02±0.67                         | 0.67  |
| Apigenin                  | 100                                | 98.26±0.78                          | 0.79  | 98.40±0.83                         | 0.84  |
| Naringenin                | 100                                | 98.63±0.89                          | 0.90  | 99.26±1.00                         | 1.01  |
| p-coumaric acid           | 100                                | 98.93±1.64                          | 1.66  | 98.48±0.45                         | 0.46  |
| Luteolin 7-O-glucoside    | 100                                | 99.30±0.57                          | 0.57  | 98.74±0.80                         | 0.81  |
| Kaempferol                | 100                                | 99.19±1.46                          | 1.48  | 99.10±1.59                         | 1.61  |
| Ferulic acid              | 100                                | 98.32±1.93                          | 1.96  | 99.38±1.17                         | 1.17  |
| Kaempferol-3-O-glucoside  | 100                                | 98.40±1.48                          | 1.50  | 99.57±0.57                         | 0.57  |
| Hesperidin                | 100                                | 98.92±1.59                          | 1.61  | 98.51±1.00                         | 1.02  |

All values represent the mean ± S.D., taken as triplicates. Percent coefficient of variation (% RSD); (SD/Mean) ×100.

**Table S4. Accuracy validation of analytical method of *C. sativus* seeds sequential extracts through % recovery method**

| Analytes                  | Standard additions µg/mL | % Recovery |        |        | Mean± SD    | RSD% |
|---------------------------|--------------------------|------------|--------|--------|-------------|------|
|                           |                          | Day 1      | Day 2  | Day 3  |             |      |
| Umbelliferone             | 50.00                    | 49.80      | 49.19  | 48.70  | 49.49±0.54  | 1.09 |
|                           | 100.00                   | 99.81      | 100.43 | 99.43  | 99.62±0.66  | 0.66 |
|                           | 200.00                   | 199.81     | 199.95 | 197.95 | 199.50±0.87 | 0.43 |
| Stigmasterol              | 50.00                    | 48.81      | 50.50  | 50.00  | 49.54±0.74  | 1.50 |
|                           | 100.00                   | 100.81     | 100.99 | 99.98  | 100.40±0.67 | 0.67 |
|                           | 200.00                   | 197.41     | 199.95 | 197.95 | 198.14±1.05 | 0.53 |
| Campesterol               | 50.00                    | 48.81      | 48.51  | 49.99  | 49.22±0.71  | 1.45 |
|                           | 100.00                   | 97.81      | 102.00 | 100.98 | 99.72±1.88  | 1.89 |
|                           | 200.00                   | 196.81     | 202.98 | 200.95 | 199.10±2.75 | 1.38 |
| β-sitosterol              | 50.00                    | 48.81      | 49.19  | 48.70  | 48.92±0.21  | 0.43 |
|                           | 100.00                   | 98.81      | 100.43 | 99.43  | 99.49±0.72  | 0.72 |
|                           | 200.00                   | 196.81     | 202.98 | 200.95 | 198.90±2.89 | 1.45 |
| Epicatechin               | 50.00                    | 50.81      | 50.49  | 49.99  | 50.29±0.62  | 1.23 |
|                           | 100.00                   | 99.81      | 100.43 | 99.43  | 99.78±0.41  | 0.41 |
|                           | 200.00                   | 199.81     | 199.95 | 197.95 | 199.32±0.84 | 0.42 |
| Scopoletin                | 50.00                    | 48.81      | 50.50  | 50.00  | 49.56±0.74  | 1.50 |
|                           | 100.00                   | 97.81      | 99.63  | 98.63  | 98.66±0.86  | 0.87 |
|                           | 200.00                   | 197.81     | 199.95 | 197.95 | 198.30±0.93 | 0.47 |
| Ellagic acid              | 50.00                    | 48.81      | 49.49  | 49.00  | 49.22±0.51  | 1.04 |
|                           | 100.00                   | 98.81      | 103.01 | 101.98 | 100.52±1.90 | 1.89 |
|                           | 200.00                   | 196.81     | 199.95 | 197.95 | 198.30±1.58 | 0.80 |
| Luteolin                  | 50.00                    | 49.80      | 50.50  | 50.00  | 50.02±0.29  | 0.57 |
|                           | 100.00                   | 99.81      | 100.99 | 99.98  | 99.84±0.84  | 0.84 |
|                           | 200.00                   | 199.81     | 201.97 | 199.95 | 200.30±0.94 | 0.47 |
| Orientin                  | 50.00                    | 49.23      | 49.52  | 48.99  | 48.99±0.48  | 0.97 |
|                           | 100.00                   | 99.32      | 102.00 | 100.98 | 100.52±1.17 | 1.17 |
|                           | 200.00                   | 199.20     | 202.98 | 200.95 | 201.06±1.89 | 0.94 |
| 1,4-Dicaffeoylquinic acid | 50.00                    | 49.00      | 48.07  | 50.55  | 49.12±0.90  | 1.83 |
|                           | 100.00                   | 98.22      | 100.46 | 100.09 | 99.19±1.04  | 1.05 |
|                           | 200.00                   | 198.33     | 201.51 | 199.73 | 199.37±1.32 | 0.66 |
| Narcissin                 | 50.00                    | 49.00      | 49.17  | 48.66  | 49.16±0.50  | 1.01 |
|                           | 100.00                   | 99.00      | 101.32 | 99.86  | 99.83±0.95  | 0.95 |
|                           | 200.00                   | 197.67     | 201.40 | 199.84 | 199.31±1.62 | 0.81 |
| Quercetin                 | 50.00                    | 49.40      | 50.95  | 49.98  | 49.86±0.66  | 1.32 |
|                           | 100.00                   | 99.33      | 101.88 | 100.59 | 100.42±1.10 | 1.10 |
|                           | 200.00                   | 199.00     | 203.30 | 200.82 | 201.02±2.07 | 1.03 |
| Apigenin                  | 50.00                    | 49.00      | 50.83  | 50.66  | 49.90±0.88  | 1.76 |

|                          |        |        |        |        |             |      |
|--------------------------|--------|--------|--------|--------|-------------|------|
|                          | 100.00 | 97.65  | 100.75 | 100.16 | 99.44±1.66  | 1.67 |
|                          | 200.00 | 199.00 | 203.30 | 200.28 | 200.91±2.10 | 1.04 |
| Naringenin               | 50.00  | 48.00  | 49.82  | 49.66  | 48.90±0.87  | 1.79 |
|                          | 100.00 | 98.50  | 100.65 | 99.81  | 99.29±0.93  | 0.94 |
|                          | 200.00 | 197.60 | 201.01 | 198.82 | 198.80±1.40 | 0.70 |
| p-coumaric acid          | 50.00  | 50.00  | 51.14  | 50.43  | 50.09±0.82  | 1.63 |
|                          | 100.00 | 98.90  | 101.25 | 100.39 | 99.88±1.01  | 1.01 |
|                          | 200.00 | 196.00 | 200.27 | 198.62 | 198.17±2.08 | 1.05 |
| Luteolin 7-O-glucoside   | 50.00  | 49.00  | 49.82  | 49.33  | 48.83±1.08  | 2.21 |
|                          | 100.00 | 99.00  | 101.66 | 100.20 | 100.17±1.18 | 1.18 |
|                          | 200.00 | 197.00 | 201.96 | 200.62 | 199.91±2.78 | 1.39 |
| Kaempferol               | 50.00  | 48.99  | 49.00  | 50.83  | 49.40±0.81  | 1.63 |
|                          | 100.00 | 98.98  | 97.65  | 100.75 | 99.54±1.48  | 1.49 |
|                          | 200.00 | 198.96 | 199.00 | 203.30 | 200.07±2.26 | 1.13 |
| Ferulic acid             | 50.00  | 48.89  | 48.00  | 49.82  | 49.41±1.10  | 2.22 |
|                          | 100.00 | 99.98  | 98.50  | 100.65 | 100.07±1.29 | 1.29 |
|                          | 200.00 | 199.96 | 197.60 | 201.01 | 200.18±2.15 | 1.08 |
| Kaempferol-3-O-glucoside | 50.00  | 48.99  | 49.99  | 48.99  | 49.56±0.83  | 1.68 |
|                          | 100.00 | 100.98 | 100.98 | 98.98  | 99.87±1.50  | 1.50 |
|                          | 200.00 | 202.96 | 202.96 | 198.96 | 201.44±2.25 | 1.12 |
| Hesperidin               | 50.00  | 49.40  | 48.99  | 48.89  | 49.13±0.25  | 0.50 |
|                          | 100.00 | 99.33  | 98.98  | 99.98  | 99.32±0.41  | 0.41 |
|                          | 200.00 | 199.00 | 198.96 | 199.96 | 199.18±0.44 | 0.22 |

All values are the mean ± S.D. taken as triplicates. All values are mean ± S.D. triplicate analyses for 3 days. Percent relative of SD variation (% RSD); (SD/Mean) ×100.

**Table S5. Gastrointestinal and respiratory pathogenic genes of sequential extracts of *C. sativus* seeds**

| #  | Symbol | Description                                                      | Type    | Matched Phenotypes                                 | Matched Phenotypes Count | -Log10(p) | Average Disease Causing Likelihood |
|----|--------|------------------------------------------------------------------|---------|----------------------------------------------------|--------------------------|-----------|------------------------------------|
| 1  | ADRB2  | Adrenoceptor Beta 2                                              | Protein | asthma; coughing; wheezing; diarrhea; constipation | 5                        | 84.88     | 3.93                               |
| 2  | CFTR   | CF Transmembrane Conductance Regulator                           | Protein | asthma; coughing; wheezing; diarrhea; constipation | 5                        | 52.05     | 3.04                               |
| 3  | IL6    | Interleukin 6                                                    | Protein | asthma; coughing; wheezing; diarrhea; constipation | 5                        | 46.88     | 2.94                               |
| 4  | TLR4   | Toll Like Receptor 4                                             | Protein | asthma; coughing; wheezing; diarrhea; constipation | 5                        | 40.21     | 2.78                               |
| 5  | PTGER2 | Prostaglandin E Receptor 2                                       | Protein | asthma; coughing; wheezing; diarrhea; constipation | 5                        | 36.67     | 2.72                               |
| 6  | IL2    | Interleukin 2                                                    | Protein | asthma; coughing; wheezing; diarrhea; constipation | 5                        | 33.94     | 2.67                               |
| 7  | CASP8  | Caspase 8                                                        | Protein | asthma; coughing; wheezing; diarrhea; constipation | 5                        | 31.88     | 2.61                               |
| 8  | SLC6A4 | Solute Carrier Family 6 Member 4                                 | Protein | asthma; coughing; wheezing; diarrhea; constipation | 5                        | 31.65     | 2.6                                |
| 9  | MMP1   | Matrix Metalloproteinase 1                                       | Protein | asthma; coughing; wheezing; diarrhea; constipation | 5                        | 31.51     | 2.59                               |
| 10 | EGFR   | Epidermal Growth Factor Receptor                                 | Protein | asthma; coughing; wheezing; diarrhea; constipation | 5                        | 31.25     | 2.58                               |
| 11 | MPO    | Myeloperoxidase                                                  | Protein | asthma; coughing; wheezing; diarrhea; constipation | 5                        | 30.98     | 2.57                               |
| 12 | MYLK   | Myosin Light Chain Kinase                                        | Protein | asthma; coughing; wheezing; diarrhea; constipation | 5                        | 30.55     | 2.56                               |
| 13 | TRPV1  | Transient Receptor Potential Cation Channel Subfamily V Member 1 | Protein | asthma; coughing; wheezing; diarrhea; constipation | 5                        | 27.02     | 2.44                               |
| 14 | NOS2   | Nitric Oxide Synthase 2                                          | Protein | asthma; coughing; wheezing; diarrhea; constipation | 5                        | 26.43     | 2.41                               |

|    |         |                                                                        |         |                                                    |   |       |      |
|----|---------|------------------------------------------------------------------------|---------|----------------------------------------------------|---|-------|------|
| 15 | MMP9    | Matrix Metalloproteinase 9                                             | Protein | asthma; coughing; wheezing; diarrhea; constipation | 5 | 25.11 | 2.35 |
| 16 | KIT     | KIT Proto-Oncogene, Receptor Tyrosine Kinase                           | Protein | asthma; coughing; wheezing; diarrhea; constipation | 5 | 24.39 | 2.33 |
| 17 | AKT1    | AKT Serine/Threonine Kinase 1                                          | Protein | asthma; coughing; wheezing; diarrhea; constipation | 5 | 23.32 | 2.3  |
| 18 | ELANE   | Elastase, Neutrophil Expressed                                         | Protein | asthma; coughing; wheezing; diarrhea; constipation | 5 | 22.63 | 2.28 |
| 19 | COMT    | Catechol-O-Methyltransferase                                           | Protein | asthma; coughing; wheezing; diarrhea; constipation | 5 | 22.15 | 2.26 |
| 20 | PPARG   | Peroxisome Proliferator Activated Receptor Gamma                       | Protein | asthma; coughing; wheezing; diarrhea; constipation | 5 | 22.07 | 2.26 |
| 21 | TLR9    | Toll Like Receptor 9                                                   | Protein | asthma; coughing; wheezing; diarrhea; constipation | 5 | 21.86 | 2.25 |
| 22 | PLA2G2A | Phospholipase A2 Group IIA                                             | Protein | asthma; coughing; wheezing; diarrhea; constipation | 5 | 19.17 | 2.13 |
| 23 | MMP12   | Matrix Metalloproteinase 12                                            | Protein | asthma; coughing; wheezing; diarrhea; constipation | 5 | 18.18 | 2.07 |
| 24 | PIK3CG  | Phosphatidylinositol-4,5-Bisphosphate 3-Kinase Catalytic Subunit Gamma | Protein | asthma; coughing; wheezing; diarrhea; constipation | 5 | 17    | 2    |
| 25 | PDE4A   | Phosphodiesterase 4A                                                   | Protein | asthma; coughing; wheezing; diarrhea; constipation | 5 | 16.94 | 1.98 |
| 26 | MMP2    | Matrix Metalloproteinase 2                                             | Protein | asthma; coughing; wheezing; diarrhea; constipation | 5 | 16.88 | 1.98 |
| 27 | AGTR1   | Angiotensin II Receptor Type 1                                         | Protein | asthma; coughing; wheezing; diarrhea; constipation | 5 | 16.78 | 1.98 |
| 28 | ADORA1  | Adenosine A1 Receptor                                                  | Protein | asthma; coughing; wheezing; diarrhea; constipation | 5 | 16.42 | 1.95 |
| 29 | EDNRA   | Endothelin Receptor Type A                                             | Protein | asthma; coughing; wheezing; diarrhea; constipation | 5 | 16.17 | 1.93 |

|    |         |                                                   |         |                                                    |   |       |      |
|----|---------|---------------------------------------------------|---------|----------------------------------------------------|---|-------|------|
| 30 | MAPK3   | Mitogen-Activated Protein Kinase 3                | Protein | asthma; coughing; wheezing; diarrhea; constipation | 5 | 16.01 | 1.93 |
| 31 | CTNNB1  | Catenin Beta 1                                    | Protein | asthma; coughing; wheezing; diarrhea; constipation | 5 | 15.46 | 1.9  |
| 32 | MAPK14  | Mitogen-Activated Protein Kinase 14               | Protein | asthma; coughing; wheezing; diarrhea; constipation | 5 | 15.44 | 1.89 |
| 33 | HDAC2   | Histone Deacetylase 2                             | Protein | asthma; coughing; wheezing; diarrhea; constipation | 5 | 15.11 | 1.87 |
| 34 | CXCR1   | C-X-C Motif Chemokine Receptor 1                  | Protein | asthma; coughing; wheezing; diarrhea; constipation | 5 | 14.88 | 1.85 |
| 35 | PDE4D   | Phosphodiesterase 4D                              | Protein | asthma; coughing; wheezing; diarrhea; constipation | 5 | 14.41 | 1.82 |
| 36 | ADRB1   | Adrenoceptor Beta 1                               | Protein | asthma; coughing; wheezing; diarrhea               | 4 | 14.02 | 1.91 |
| 37 | CACNA1A | Calcium Voltage-Gated Channel Subunit Alpha1 A    | Protein | coughing; diarrhea; constipation                   | 3 | 10.03 | 1.74 |
| 38 | PRKCA   | Protein Kinase C Alpha                            | Protein | asthma; coughing; wheezing; diarrhea; constipation | 5 | 8.87  | 1.53 |
| 39 | ACHE    | Acetylcholinesterase (Cartwright Blood Group)     | Protein | asthma; coughing; wheezing; diarrhea; constipation | 5 | 7.22  | 1.43 |
| 40 | CNR1    | Cannabinoid Receptor 1                            | Protein | asthma; coughing; diarrhea; constipation           | 4 | 7.07  | 1.48 |
| 41 | NFE2L2  | NFE2 Like BZIP Transcription Factor 2             | Protein | asthma; coughing; wheezing; diarrhea; constipation | 5 | 7.02  | 1.41 |
| 42 | CHRNA3  | Cholinergic Receptor Nicotinic Alpha 3 Subunit    | Protein | asthma; coughing; wheezing; diarrhea; constipation | 5 | 6.61  | 1.38 |
| 43 | MAOA    | Monoamine Oxidase A                               | Protein | asthma; coughing; diarrhea; constipation           | 4 | 6.6   | 1.44 |
| 44 | INPP5E  | Inositol Polyphosphate-5-Phosphatase E            | Protein | coughing; wheezing; constipation                   | 3 | 6.23  | 1.49 |
| 45 | PTPN11  | Protein Tyrosine Phosphatase Non-Receptor Type 11 | Protein | asthma; coughing; wheezing; diarrhea; constipation | 5 | 6.1   | 1.34 |
| 46 | THRA    | Thyroid Hormone Receptor Alpha                    | Protein | asthma; coughing; diarrhea; constipation           | 4 | 5.75  | 1.37 |

|    |         |                                                   |         |                                                    |   |      |      |
|----|---------|---------------------------------------------------|---------|----------------------------------------------------|---|------|------|
| 47 | ALDH2   | Aldehyde Dehydrogenase 2 Family Member            | Protein | asthma; coughing; diarrhea; constipation           | 4 | 4.73 | 1.28 |
| 48 | PTK2    | Protein Tyrosine Kinase 2                         | Protein | asthma; coughing; wheezing; diarrhea; constipation | 5 | 4.62 | 1.23 |
| 49 | RARA    | Retinoic Acid Receptor Alpha                      | Protein | asthma; coughing; wheezing                         | 3 | 4.19 | 1.29 |
| 50 | RARB    | Retinoic Acid Receptor Beta                       | Protein | asthma; coughing; wheezing; diarrhea; constipation | 5 | 3.92 | 1.16 |
| 51 | MAP2K4  | Mitogen-Activated Protein Kinase Kinase 4         | Protein | asthma; coughing; wheezing; diarrhea; constipation | 5 | 3.36 | 1.1  |
| 52 | CHRM2   | Cholinergic Receptor Muscarinic 2                 | Protein | asthma; coughing; constipation                     | 3 | 3.14 | 1.17 |
| 53 | MAOB    | Monoamine Oxidase B                               | Protein | asthma; coughing; diarrhea; constipation           | 4 | 3.01 | 1.11 |
| 54 | LYN     | LYN Proto-Oncogene, Src Family Tyrosine Kinase    | Protein | asthma; coughing; diarrhea                         | 3 | 2.9  | 1.14 |
| 55 | PRKCD   | Protein Kinase C Delta                            | Protein | asthma; coughing; diarrhea; constipation           | 4 | 2.7  | 1.06 |
| 56 | CHRM1   | Cholinergic Receptor Muscarinic 1                 | Protein | asthma; coughing; wheezing; constipation           | 4 | 2.64 | 1.05 |
| 57 | CACNA1C | Calcium Voltage-Gated Channel Subunit Alpha1 C    | Protein | asthma; coughing; diarrhea; constipation           | 4 | 2.35 | 1.01 |
| 58 | CYP17A1 | Cytochrome P450 Family 17 Subfamily A Member 1    | Protein | asthma; coughing; diarrhea; constipation           | 4 | 2.24 | 0.99 |
| 59 | CSNK2A1 | Casein Kinase 2 Alpha 1                           | Protein | diarrhea; constipation                             | 2 | 1.93 | 1.07 |
| 60 | GSK3B   | Glycogen Synthase Kinase 3 Beta                   | Protein | asthma; diarrhea; constipation                     | 3 | 1.69 | 0.95 |
| 61 | HDAC8   | Histone Deacetylase 8                             | Protein | asthma; diarrhea; constipation                     | 3 | 1.62 | 0.93 |
| 62 | GABBR1  | Gamma-Aminobutyric Acid Type B Receptor Subunit 1 | Protein | asthma; coughing; diarrhea; constipation           | 4 | 1.57 | 0.88 |
| 63 | ADCY1   | Adenylate Cyclase 1                               | Protein | asthma; diarrhea                                   | 2 | 1.36 | 0.94 |
| 64 | PRKCB   | Protein Kinase C Beta                             | Protein | asthma; diarrhea; constipation                     | 3 | 1.36 | 0.88 |



|    |         |                                                                       |         |                                |   |      |      |
|----|---------|-----------------------------------------------------------------------|---------|--------------------------------|---|------|------|
| 65 | DYRK1A  | Dual Specificity Tyrosine Phosphorylation Regulated Kinase 1A         | Protein | constipation                   | 1 | 1.24 | 1.03 |
| 66 | KDM5C   | Lysine Demethylase 5C                                                 | Protein | asthma; coughing; constipation | 3 | 1.11 | 0.81 |
| 67 | SLC18A3 | Solute Carrier Family 18 Member A3                                    | Protein | asthma; coughing; constipation | 3 | 1.07 | 0.8  |
| 68 | PIK3CB  | Phosphatidylinositol-4,5-Bisphosphate 3-Kinase Catalytic Subunit Beta | Protein | asthma; diarrhea; constipation | 3 | 1.02 | 0.79 |
| 69 | PLCG1   | Phospholipase C Gamma 1                                               | Protein | asthma; coughing; diarrhea     | 3 | 1    | 0.78 |
| 70 | ADRA1A  | Adrenoceptor Alpha 1A                                                 | Protein | asthma; coughing               | 2 | 0.91 | 0.81 |
| 71 | PPARD   | Peroxisome Proliferator Activated Receptor Delta                      | Protein | asthma; diarrhea; constipation | 3 | 0.89 | 0.74 |
| 72 | CAMK2B  | Calcium/Calmodulin Dependent Protein Kinase II Beta                   | Protein | constipation                   | 1 | 0.87 | 0.91 |
| 73 | GLUL    | Glutamate-Ammonia Ligase                                              | Protein | diarrhea; constipation         | 2 | 0.77 | 0.75 |
| 74 | ITPR1   | Inositol 1,4,5-Trisphosphate Receptor Type 1                          | Protein | asthma                         | 1 | 0.42 | 0.68 |
| 75 | HSD11B1 | Hydroxysteroid 11-Beta Dehydrogenase 1                                | Protein | asthma                         | 1 | 0.32 | 0.61 |
| 76 | CACNA1D | Calcium Voltage-Gated Channel Subunit Alpha1 D                        | Protein | coughing                       | 1 | 0.23 | 0.5  |
| 77 | SLC5A7  | Solute Carrier Family 5 Member 7                                      | Protein | coughing                       | 1 | 0.17 | 0.36 |
| 78 | MYL9    | Myosin Light Chain 9                                                  | Protein | asthma                         | 1 | 0.16 | 0.36 |
| 79 | CAMK2A  | Calcium/Calmodulin Dependent Protein Kinase II Alpha                  | Protein | constipation                   | 1 | 0.1  |      |

**Table S6. Gastrointestinal and respiratory pathogenic genes retrieved for compounds**

| Extracts | Compound                  | Genes                                                                                                                                                                     |
|----------|---------------------------|---------------------------------------------------------------------------------------------------------------------------------------------------------------------------|
| Aqueous  | Kaempferol                | ADRB2, ADCY1, CFTR, MPO, MYLK, MMP12, AKT1, CXCR1, ADORA1, PRKCA, ACHE, CACNA1C, EDNRA, PTK2, CSNK2A1, GSK3B, MYL9, ADRA1A, CAMK2B, CAMK2A, EGFR, MMP9, MMP2, MAOA, PLCG1 |
|          | Ferulic acid              | TLR4, EGFR, MMP1, MMP9, NOS2, TLR9, CTNNB1, MMP2, MAOA, NFE2L2, MAOB, HSD11B1                                                                                             |
|          | Luteolin 7 glucoside      | IL2, ALDH2, MMP1, MMP12, ADORA1, PRKCA, ACHE                                                                                                                              |
|          | Kaempferol 3-O-glucoside  | PIK3CG, PRKCD, PRKCB, IL2, MMP9, MYLK, MMP2, ADORA1, PRKCA, ACHE, CAMK2A                                                                                                  |
|          | Hesperidin                | CHRM2, MMP12, ADORA1                                                                                                                                                      |
|          | p coumaric acid           | RARB, PLCG1, TLR4, MMP1, MMP9, MMP2, HSD11B1                                                                                                                              |
| Ethanol  | Quercetin                 | CHRM2, MPO, MMP9, MYLK, MMP12, AKT1, CXCR1, MMP2, AGTR1, PIK3CG, ADORA1, CACNA1A, CSNK2A1, CAMK2B, EGFR, ACHE, MAOA, PTK2, GSK3B, ITPR1                                   |
|          | Apigenin                  | CFTR, INPP5E, MPO, EGFR, MMP9, MMP12, CXCR1, MMP2, ADORA1, CACNA1A, ACHE, MAOA, PTK2, CSNK2A1, GSK3B, CAMK2B                                                              |
|          | Narcissin                 | IL2, ADRB1, PRKCA, ALDH2, MYLK, PIK3CG, ADORA1, ACHE, MAOA, PRKCD, PRKCB, CAMK2B                                                                                          |
|          | 1,4-Dicaffeoylquinic acid | ELANE, MMP1, CASP8, PRKCD, PRKCB, MMP9, MMP12, MMP2                                                                                                                       |
|          | Scopoletin                | EGFR, COMT, ACHE, MAOA, PTK2, MAOB, GSK3B, ITPR1                                                                                                                          |
|          | Ellagic acid              | ADCY1, LYN, EGFR, AKT1, CACNA1D, ACHE, MAOA, PTK2, CSNK2A1, GSK3B, ADRA1A                                                                                                 |
|          | naringenin                | KIT, PPARG, PLA2G2A, CACNA1D, PIK3CB, EDNRA, DYRK1A, ADRA1A, MMP12, MMP2, ADORA1, MAOB                                                                                    |
|          | Orientin                  | MAP2K4, CAMK2A, PRKCB, CAMK2B                                                                                                                                             |
|          | Luteolin                  | CFTR, MPO, EGFR, MMP9, MMP12, AKT1, CXCR1, MMP2, ADORA1, CACNA1D, ACHE, MAOA, PTK2, CSNK2A1, GSK3B, CAMK2B                                                                |
| DCM      | Stigmasterol              | SLC6A4, NOS2, PPARG, CHRM1, ACHE, PRKCD, CHRM2, PRKCB, CYP17A1, PPARD                                                                                                     |
|          | Umbelliferone             | EGFR, CAMK2A, AKT1, HDAC2, PIK3R6, MAOA, ALDH2, ADCY1, CSNK2A1, GSK3B, HDAC8, SLC5A7                                                                                      |
|          | Sitosterol                | MAPK14, MAPK3, SLC6A4, NOS2, PPARG, ACHE, PRKCD, CHRM2, PRKCB, CYP17A1, PPARD                                                                                             |
|          | Campesterol               | SLC6A4, ACHE, CHRM2, CYP17A1                                                                                                                                              |
| Hexane   | Linoleic acid             | IL6, ADCY1, TRPV1, PTGER2, NOS2, MAPK14, PDE4A, MAPK3, MMP2, ACHE, CNR1, CHRNA3, SLC5A7, PIK3R6, PDE4D, PTPN11, EDNRA, CYP17A1, PPARD, GLUL, HSD11B1, CAMK2A, MMP12       |
|          | myristic acid             | MMP9, MMP12, CACNA1A, THRA, PTGER2, MAPK14, PDE4A, MMP2, EDNRA, RARA, RARB, GABBR1, PPARD, KDM5C, HSD11B1                                                                 |
|          | Palmitic acid             | CHRM1, RARA, RARB, CHRM2, PTGER2, MAPK14, GABBR1, PPARD, KDM5C, HSD11B1, CAMK2A                                                                                           |
|          | Arachidic acid            | GABBR1, KDM5C, SLC18A3, PTGER2, CACNA1A, PPARD, HSD11B1                                                                                                                   |

**Table S7. Top 15 GO Biological process of bioactive compounds of sequential extracts of *C. sativus* for gastrointestinal and respiratory target genes.**

| Extracts | ID         | Description                                                                                 | pvalue         | p.adjust       | qvalue         | genes                                                           |
|----------|------------|---------------------------------------------------------------------------------------------|----------------|----------------|----------------|-----------------------------------------------------------------|
| Hexane   | GO:0001505 | regulation of neurotransmitter levels                                                       | 0.000000000184 | 0.000000319363 | 0.000000170994 | ADCY1, ACHE, CNR1, CHRNA3, SLC5A7, CHRM2, SLC18A3, GLUL, CAMK2A |
|          | GO:0032496 | response to lipopolysaccharide                                                              | 0.000000004071 | 0.000002213924 | 0.000001185383 | IL6, PTGER2, NOS2, MAPK14, MAPK3, CNR1, PDE4D, RARA, PPARD      |
|          | GO:0006836 | neurotransmitter transport                                                                  | 0.000000004458 | 0.000002213924 | 0.000001185383 | ADCY1, CNR1, CHRNA3, SLC5A7, CHRM2, SLC18A3, GLUL, CAMK2A       |
|          | GO:0007188 | adenylate cyclase-modulating G protein-coupled receptor signaling pathway                   | 0.000000005107 | 0.000002213924 | 0.000001185383 | ADCY1, PTGER2, CHRM1, CNR1, PDE4D, EDNRA, CHRM2, GABBR1         |
|          | GO:0002237 | response to molecule of bacterial origin                                                    | 0.000000007094 | 0.000002460206 | 0.000001317248 | IL6, PTGER2, NOS2, MAPK14, MAPK3, CNR1, PDE4D, RARA, PPARD      |
|          | GO:0007187 | G protein-coupled receptor signaling pathway, coupled to cyclic nucleotide second messenger | 0.000000013169 | 0.000003805958 | 0.000002037792 | ADCY1, PTGER2, CHRM1, CNR1, PDE4D, EDNRA, CHRM2, GABBR1         |
|          | GO:0007269 | neurotransmitter secretion                                                                  | 0.000000018263 | 0.000003958599 | 0.000002119520 | ADCY1, CNR1, CHRNA3, SLC5A7, CHRM2, SLC18A3, CAMK2A             |
|          | GO:0099643 | signal release from synapse                                                                 | 0.000000018263 | 0.000003958599 | 0.000002119520 | ADCY1, CNR1, CHRNA3, SLC5A7, CHRM2,                             |

|     |            |                                                   |                |                |                |                                                                |
|-----|------------|---------------------------------------------------|----------------|----------------|----------------|----------------------------------------------------------------|
|     |            |                                                   |                |                |                | SLC18A3,<br>CAMK2A                                             |
|     | GO:0050796 | regulation of insulin secretion                   | 0.000000023050 | 0.000004441027 | 0.000002377822 | IL6, NOS2, CACNA1A, CNR1, PTPN11, PPARD, GLUL                  |
|     | GO:0050804 | modulation of chemical synaptic transmission      | 0.000000057740 | 0.000008663677 | 0.000004638720 | ADCY1, CACNA1A, ACHE, CNR1, CHRNA3, RARA, CHRM2, GLUL, CAMK2A  |
|     | GO:0099177 | regulation of trans-synaptic signaling            | 0.000000058837 | 0.000008663677 | 0.000004638720 | ADCY1, CACNA1A, ACHE, CNR1, CHRNA3, RARA, CHRM2, GLUL, CAMK2A  |
|     | GO:0071222 | cellular response to lipopolysaccharide           | 0.000000059956 | 0.000008663677 | 0.000004638720 | IL6, NOS2, MAPK14, MAPK3, PDE4D, RARA, PPARD                   |
|     | GO:0030073 | insulin secretion                                 | 0.000000070545 | 0.000008737448 | 0.000004678218 | IL6, NOS2, CACNA1A, CNR1, PTPN11, PPARD, GLUL                  |
|     | GO:0090276 | regulation of peptide hormone secretion           | 0.000000070545 | 0.000008737448 | 0.000004678218 | IL6, NOS2, CACNA1A, CNR1, PTPN11, PPARD, GLUL                  |
|     | GO:0071219 | cellular response to molecule of bacterial origin | 0.000000093606 | 0.000010820841 | 0.000005793712 | IL6, NOS2, MAPK14, MAPK3, PDE4D, RARA, PPARD                   |
| DCM | GO:0001505 | regulation of neurotransmitter levels             | 0.000000000007 | 0.000000012266 | 0.000000005478 | SLC6A4, CAMK2A, ACHE, MAOA, ADCY1, CHRM2, PRKCB, GSK3B, SLC5A7 |
|     | GO:0018105 | peptidyl-serine phosphorylation                   | 0.000000000082 | 0.000000072977 | 0.000000032589 | EGFR, CAMK2A, AKT1, MAPK14, MAPK3, PRKCD, PRKCB,               |

|            |                                                                   |                |                |                |                                                                                      |                   |
|------------|-------------------------------------------------------------------|----------------|----------------|----------------|--------------------------------------------------------------------------------------|-------------------|
|            |                                                                   |                |                |                |                                                                                      | CSNK2A1,<br>GSK3B |
| GO:0018209 | peptidyl-serine<br>modification                                   | 0.000000000155 | 0.000000091863 | 0.000000041023 | EGFR,<br>CAMK2A,<br>AKT1, MAPK14,<br>MAPK3,<br>PRKCD,<br>PRKCB,<br>CSNK2A1,<br>GSK3B |                   |
| GO:0048511 | rhythmic process                                                  | 0.000000002501 | 0.000001114167 | 0.000000497555 | SLC6A4, EGFR,<br>NOS2, PPARG,<br>HDAC2,<br>ADCY1,<br>CSNK2A1,<br>GSK3B               |                   |
| GO:0018107 | peptidyl-threonine<br>phosphorylation                             | 0.000000006142 | 0.000002172984 | 0.000000970392 | CAMK2A,<br>AKT1, PRKCD,<br>PRKCB,<br>CSNK2A1,<br>GSK3B                               |                   |
| GO:0007623 | circadian rhythm                                                  | 0.000000007316 | 0.000002172984 | 0.000000970392 | SLC6A4, EGFR,<br>NOS2, PPARG,<br>HDAC2,<br>ADCY1, GSK3B                              |                   |
| GO:0018210 | peptidyl-threonine<br>modification                                | 0.000000009601 | 0.000002290986 | 0.000001023088 | CAMK2A,<br>AKT1, PRKCD,<br>PRKCB,<br>CSNK2A1,<br>GSK3B                               |                   |
| GO:0006836 | neurotransmitter<br>transport                                     | 0.000000010285 | 0.000002290986 | 0.000001023088 | SLC6A4,<br>CAMK2A,<br>ADCY1,<br>CHRM2,<br>PRKCB, GSK3B,<br>SLC5A7                    |                   |
| GO:0001890 | placenta<br>development                                           | 0.000000034543 | 0.000006839480 | 0.000003054313 | EGFR, PPARG,<br>AKT1, MAPK14,<br>MAPK3, PPARG                                        |                   |
| GO:0042133 | neurotransmitter<br>metabolic process                             | 0.000000053982 | 0.000007730984 | 0.000003452433 | SLC6A4, ACHE,<br>MAOA, SLC5A7                                                        |                   |
| GO:0050804 | modulation of<br>chemical synaptic<br>transmission                | 0.000000055450 | 0.000007730984 | 0.000003452433 | SLC6A4, EGFR,<br>CAMK2A,<br>ACHE, ADCY1,<br>CHRM2,<br>PRKCB, GSK3B                   |                   |
| GO:0051090 | regulation of DNA-<br>binding<br>transcription factor<br>activity | 0.000000056399 | 0.000007730984 | 0.000003452433 | CAMK2A,<br>PPARG, AKT1,<br>MAPK14,<br>MAPK3,                                         |                   |

|         |            |                                              |                |                |                |                                                                                                                          |
|---------|------------|----------------------------------------------|----------------|----------------|----------------|--------------------------------------------------------------------------------------------------------------------------|
|         |            |                                              |                |                |                | HDAC2,<br>ADCY1, PRKCB                                                                                                   |
|         | GO:0007269 | neurotransmitter secretion                   | 0.000000068500 | 0.000008137817 | 0.000003634113 | CAMK2A,<br>ADCY1,<br>CHRM2,<br>PRKCB, GSK3B,<br>SLC5A7                                                                   |
|         | GO:1903351 | cellular response to dopamine                | 0.000000087370 | 0.000009682781 | 0.000004324049 | MAPK3,<br>HDAC2,<br>CHRM1,<br>CHRM2, GSK3B                                                                               |
|         | GO:1903350 | response to dopamine                         | 0.000000092372 | 0.000009682781 | 0.000004324049 | MAPK3,<br>HDAC2,<br>CHRM1,<br>CHRM2, GSK3B                                                                               |
| Ethanol | GO:0001505 | regulation of neurotransmitter levels        | 0.000000000006 | 0.000000014348 | 0.000000007144 | CHRM2,<br>ADCY1, COMT,<br>CACNA1D,<br>ACHE, MAOA,<br>MAOB, PRKCB,<br>GSK3B,<br>ADRA1A,<br>CAMK2A                         |
|         | GO:0050804 | modulation of chemical synaptic transmission | 0.000000000028 | 0.000000016948 | 0.000000008438 | CHRM2, EGFR,<br>ADCY1, KIT,<br>ADORA1,<br>CACNA1D,<br>CACNA1A,<br>ACHE, PRKCB,<br>GSK3B,<br>ADRA1A,<br>CAMK2B,<br>CAMK2A |
|         | GO:0099177 | regulation of trans-synaptic signaling       | 0.000000000028 | 0.000000016948 | 0.000000008438 | CHRM2, EGFR,<br>ADCY1, KIT,<br>ADORA1,<br>CACNA1D,<br>CACNA1A,<br>ACHE, PRKCB,<br>GSK3B,<br>ADRA1A,<br>CAMK2B,<br>CAMK2A |
|         | GO:0006874 | cellular calcium ion homeostasis             | 0.000000000029 | 0.000000016948 | 0.000000008438 | IL2, ELANE,<br>CXCR1, AGTR1,<br>PIK3CG,<br>ADORA1,<br>CACNA1D,<br>CACNA1A,<br>EDNRA, LYN,                                |

|  |            |                                                   |                |                |                |                                                                                              |
|--|------------|---------------------------------------------------|----------------|----------------|----------------|----------------------------------------------------------------------------------------------|
|  |            |                                                   |                |                |                | PRKCB,<br>ADRA1A, ITPR1                                                                      |
|  | GO:0055074 | calcium ion homeostasis                           | 0.000000000040 | 0.000000018725 | 0.000000009323 | IL2, ELANE, CXCR1, AGTR1, PIK3CG, ADORA1, CACNA1D, CACNA1A, EDNRA, LYN, PRKCB, ADRA1A, ITPR1 |
|  | GO:0072503 | cellular divalent inorganic cation homeostasis    | 0.000000000075 | 0.000000029002 | 0.000000014440 | IL2, ELANE, CXCR1, AGTR1, PIK3CG, ADORA1, CACNA1D, CACNA1A, EDNRA, LYN, PRKCB, ADRA1A, ITPR1 |
|  | GO:1903522 | regulation of blood circulation                   | 0.000000000096 | 0.000000031616 | 0.000000015742 | CHRM2, IL2, EGFR, AKT1, AGTR1, PIK3CG, ADORA1, CACNA1D, ADRB1, ADRA1A, ITPR1                 |
|  | GO:0018107 | peptidyl-threonine phosphorylation                | 0.000000000306 | 0.000000088458 | 0.000000044043 | AKT1, PRKCA, PRKCD, PRKCB, DYRK1A, CSNK2A1, GSK3B, CAMK2A                                    |
|  | GO:0051480 | regulation of cytosolic calcium ion concentration | 0.000000000546 | 0.000000128293 | 0.000000063877 | IL2, CXCR1, AGTR1, PIK3CG, ADORA1, CACNA1D, CACNA1A, EDNRA, LYN, ADRA1A, ITPR1               |
|  | GO:0018210 | peptidyl-threonine modification                   | 0.000000000554 | 0.000000128293 | 0.000000063877 | AKT1, PRKCA, PRKCD, PRKCB, DYRK1A, CSNK2A1,                                                  |

|         |            |                                                |                |                |                |                                                                                       |
|---------|------------|------------------------------------------------|----------------|----------------|----------------|---------------------------------------------------------------------------------------|
|         |            |                                                |                |                |                | GSK3B,<br>CAMK2A                                                                      |
|         | GO:0003012 | muscle system process                          | 0.000000000630 | 0.000000132687 | 0.000000066065 | CHRM2, MYLK, KIT, PIK3CG, ADORA1, CACNA1D, PRKCA, EDNRA, PTK2, MAP2K4, ADRA1A, CAMK2B |
|         | GO:1901653 | cellular response to peptide                   | 0.000000001712 | 0.000000330191 | 0.000000164401 | ADCY1, PPARG, AKT1, AGTR1, CACNA1A, PRKCD, PTK2, LYN, PRKCB, GSK3B, CAMK2A            |
|         | GO:0045834 | positive regulation of lipid metabolic process | 0.000000002602 | 0.000000453093 | 0.000000225594 | KIT, PPARG, AKT1, AGTR1, ADORA1, PRKCD, PTK2, LYN                                     |
|         | GO:0014065 | phosphatidylinositol 3-kinase signaling        | 0.000000002740 | 0.000000453093 | 0.000000225594 | EGFR, KIT, AKT1, PIK3CG, INPP5E, PIK3CB, PTK2, LYN                                    |
|         | GO:0050727 | regulation of inflammatory response            | 0.000000003397 | 0.000000469607 | 0.000000233816 | IL2, ELANE, EGFR, MMP9, PPARG, PLA2G2A, AGTR1, PIK3CG, ADORA1, PRKCD, LYN             |
| Aqueous | GO:0050804 | modulation of chemical synaptic transmission   | 0.000000000099 | 0.000000086024 | 0.000000041796 | ADRB2, ADCY1, EGFR, ADORA1, CHRM2, ACHE, PLCG1, PRKCB, GSK3B, ADRA1A, CAMK2B, CAMK2A  |
|         | GO:0099177 | regulation of trans-synaptic signaling         | 0.000000000102 | 0.000000086024 | 0.000000041796 | ADRB2, ADCY1, EGFR, ADORA1, CHRM2, ACHE, PLCG1, PRKCB, GSK3B, ADRA1A,                 |



|            |                                       |                |                |                |                                                                                       |                   |
|------------|---------------------------------------|----------------|----------------|----------------|---------------------------------------------------------------------------------------|-------------------|
|            |                                       |                |                |                |                                                                                       | CAMK2B,<br>CAMK2A |
| GO:0090257 | regulation of muscle system process   | 0.000000000105 | 0.000000086024 | 0.000000041796 | ADRB2, PIK3CG, ADORA1, CHRM2, PRKCA, CACNA1C, PTK2, MYL9, ADRA1A, CAMK2B              |                   |
| GO:0003012 | muscle system process                 | 0.000000000137 | 0.000000086024 | 0.000000041796 | ADRB2, MYLK, PIK3CG, ADORA1, CHRM2, PRKCA, CACNA1C, EDNRA, PTK2, MYL9, ADRA1A, CAMK2B |                   |
| GO:0010959 | regulation of metal ion transport     | 0.000000000406 | 0.000000204046 | 0.000000099138 | ADRB2, MYLK, TLR9, AKT1, CTNNB1, PIK3CG, ADORA1, CACNA1C, PLCG1, CAMK2B, CAMK2A       |                   |
| GO:0001505 | regulation of neurotransmitter levels | 0.000000001211 | 0.000000506597 | 0.000000246136 | ADCY1, CHRM2, ACHE, MAOA, MAOB, PRKCB, GSK3B, ADRA1A, CAMK2A                          |                   |
| GO:1904645 | response to amyloid-beta              | 0.000000001843 | 0.000000661250 | 0.000000321276 | ADRB2, TLR4, MMP9, MMP12, MMP2, GSK3B                                                 |                   |
| GO:0062197 | cellular response to chemical stress  | 0.000000002879 | 0.000000903775 | 0.000000439110 | TLR4, MPO, EGFR, MMP9, MYLK, AKT1, CTNNB1, MMP2, PRKCD, NFE2L2                        |                   |
| GO:0018107 | peptidyl-threonine phosphorylation    | 0.000000004633 | 0.000001244646 | 0.000000604726 | AKT1, PRKCA, PRKCD, PRKCB, CSNK2A1,                                                   |                   |

|  |            |                                          |                |                |                |                                                                                                |
|--|------------|------------------------------------------|----------------|----------------|----------------|------------------------------------------------------------------------------------------------|
|  |            |                                          |                |                |                | GSK3B,<br>CAMK2A                                                                               |
|  | GO:0002791 | regulation of<br>peptide secretion       | 0.000000004957 | 0.000001244646 | 0.000000604726 | CFTR, TLR4,<br>IL2, EGFR,<br>NOS2, TLR9,<br>ADORA1,<br>PRKCA, ACHE,<br>CACNA1C                 |
|  | GO:1901653 | cellular response to<br>peptide          | 0.000000007519 | 0.000001627640 | 0.000000790809 | ADRB2, ADCY1,<br>TLR4, AKT1,<br>PRKCD,<br>NFE2L2, PTK2,<br>PRKCB, GSK3B,<br>CAMK2A             |
|  | GO:0018210 | peptidyl-threonine<br>modification       | 0.000000007778 | 0.000001627640 | 0.000000790809 | AKT1, PRKCA,<br>PRKCD,<br>PRKCB,<br>CSNK2A1,<br>GSK3B,<br>CAMK2A                               |
|  | GO:0034599 | cellular response to<br>oxidative stress | 0.000000013596 | 0.000002573820 | 0.000001250522 | TLR4, MPO,<br>EGFR, MMP9,<br>AKT1, CTNNB1,<br>MMP2, PRKCD,<br>NFE2L2                           |
|  | GO:0006816 | calcium ion<br>transport                 | 0.000000014350 | 0.000002573820 | 0.000001250522 | MYLK, TLR9,<br>CTNNB1,<br>PIK3CG,<br>CACNA1C,<br>PLCG1, PRKCB,<br>ADRA1A,<br>CAMK2B,<br>CAMK2A |
|  | GO:0038127 | ERBB signaling<br>pathway                | 0.000000020654 | 0.000003457416 | 0.000001679828 | EGFR, MMP9,<br>AKT1, ADORA1,<br>PRKCA, PTK2,<br>PLCG1                                          |

**Table S8. Top 15 KEGG pathway of bioactive compounds of sequential extracts of *C. sativus* for gastrointestinal and respiratory target genes.**

| Extract | ID       | Description                                      | pvalue           | p.adjust         | qvalue           | genes                                                                              |
|---------|----------|--------------------------------------------------|------------------|------------------|------------------|------------------------------------------------------------------------------------|
| Hexane  | hsa04725 | Cholinergic synapse                              | 0.00000000000002 | 0.00000000000029 | 0.00000000000016 | ADCY1, CHRM1, CACNA1A, MAPK3, ACHE, CHRNA3, SLC5A7, PIK3R6, CHRM2, SLC18A3, CAMK2A |
|         | hsa04024 | cAMP signaling pathway                           | 0.0000000045312  | 0.000000425934   | 0.000000226561   | ADCY1, PTGER2, CHRM1, PDE4A, MAPK3, PDE4D, EDNRA, CHRM2, GABBR1, CAMK2A            |
|         | hsa04080 | Neuroactive ligand-receptor interaction          | 0.0000032763952  | 0.000205320766   | 0.000109213173   | TRPV1, PTGER2, CHRM1, CNR1, CHRNA3, EDNRA, THRA, CHRM2, GABBR1                     |
|         | hsa04926 | Relaxin signaling pathway                        | 0.0000076532504  | 0.000359702771   | 0.000191331261   | ADCY1, MMP9, NOS2, MAPK14, MAPK3, MMP2                                             |
|         | hsa04915 | Estrogen signaling pathway                       | 0.0000112863929  | 0.000424368375   | 0.000225727859   | ADCY1, MMP9, MAPK3, MMP2, RARA, GABBR1                                             |
|         | hsa05032 | Morphine addiction                               | 0.0000214772699  | 0.000578663078   | 0.000307799509   | ADCY1, CACNA1A, PDE4A, PDE4D, GABBR1                                               |
|         | hsa04912 | GnRH signaling pathway                           | 0.0000238735953  | 0.000578663078   | 0.000307799509   | ADCY1, MAPK14, MAPK3, MMP2, CAMK2A                                                 |
|         | hsa04020 | Calcium signaling pathway                        | 0.0000260630092  | 0.000578663078   | 0.000307799509   | ADCY1, CHRM1, NOS2, CACNA1A, EDNRA, CHRM2, CAMK2A                                  |
|         | hsa01522 | Endocrine resistance                             | 0.0000307799509  | 0.000578663078   | 0.000307799509   | ADCY1, MMP9, MAPK14, MAPK3, MMP2                                                   |
|         | hsa04750 | Inflammatory mediator regulation of TRP channels | 0.0000307799509  | 0.000578663078   | 0.000307799509   | ADCY1, TRPV1, PTGER2, MAPK14, CAMK2A                                               |
|         | hsa05142 | Chagas disease                                   | 0.0000373481568  | 0.000638313952   | 0.000339528698   | IL6, ADCY1, NOS2, MAPK14, MAPK3                                                    |
|         | hsa05205 | Proteoglycans in cancer                          | 0.0001051770993  | 0.001647774556   | 0.000876475828   | MMP9, MAPK14, MAPK3, MMP2, PTPN11, CAMK2A                                          |
|         | hsa05133 | Pertussis                                        | 0.0001848798952  | 0.002673647715   | 0.001422153040   | IL6, NOS2, MAPK14, MAPK3                                                           |

|     |          |                                                |                  |                 |                 |                                                                       |
|-----|----------|------------------------------------------------|------------------|-----------------|-----------------|-----------------------------------------------------------------------|
|     | hsa04723 | Retrograde endocannabinoid signaling           | 0.0002190368108  | 0.002922790992  | 0.001554676060  | ADCY1, CACNA1A, MAPK14, MAPK3, CNR1                                   |
|     | hsa04261 | Adrenergic signaling in cardiomyocytes         | 0.0002332014089  | 0.002922790992  | 0.001554676060  | ADCY1, MAPK14, MAPK3, PIK3R6, CAMK2A                                  |
| DCM | hsa04725 | Cholinergic synapse                            | 0.00000000000003 | 0.0000000000061 | 0.0000000000016 | CAMK2A, AKT1, MAPK3, PIK3R6, CHRM1, ACHE, ADCY1, CHRM2, PRKCB, SLC5A7 |
|     | hsa04912 | GnRH signaling pathway                         | 0.0000000061222  | 0.000000606093  | 0.000000161109  | EGFR, CAMK2A, MAPK14, MAPK3, PRKCD, ADCY1, PRKCB                      |
|     | hsa04012 | ErbB signaling pathway                         | 0.0000001282355  | 0.000008463541  | 0.000002249745  | EGFR, CAMK2A, AKT1, MAPK3, PRKCB, GSK3B                               |
|     | hsa04066 | HIF-1 signaling pathway                        | 0.0000005670533  | 0.000026963042  | 0.000007167209  | EGFR, CAMK2A, NOS2, AKT1, MAPK3, PRKCB                                |
|     | hsa04062 | Chemokine signaling pathway                    | 0.0000009186974  | 0.000026963042  | 0.000007167209  | AKT1, MAPK3, PIK3R6, PRKCD, ADCY1, PRKCB, GSK3B                       |
|     | hsa04722 | Neurotrophin signaling pathway                 | 0.0000009532389  | 0.000026963042  | 0.000007167209  | CAMK2A, AKT1, MAPK14, MAPK3, PRKCD, GSK3B                             |
|     | hsa04935 | Growth hormone synthesis, secretion and action | 0.0000009532389  | 0.000026963042  | 0.000007167209  | AKT1, MAPK14, MAPK3, ADCY1, PRKCB, GSK3B                              |
|     | hsa04926 | Relaxin signaling pathway                      | 0.0000015328203  | 0.000034104399  | 0.000009065497  | EGFR, NOS2, AKT1, MAPK14, MAPK3, ADCY1                                |
|     | hsa04917 | Prolactin signaling pathway                    | 0.0000015502000  | 0.000034104399  | 0.000009065497  | AKT1, MAPK14, MAPK3, CYP17A1, GSK3B                                   |
|     | hsa04728 | Dopaminergic synapse                           | 0.0000017541807  | 0.000034732778  | 0.000009232530  | CAMK2A, AKT1, MAPK14, MAOA, PRKCB, GSK3B                              |
|     | hsa05214 | Glioma                                         | 0.0000021890722  | 0.000039403300  | 0.000010474030  | EGFR, CAMK2A, AKT1, MAPK3, PRKCB                                      |
|     | hsa05163 | Human cytomegalovirus infection                | 0.0000026650335  | 0.000043197056  | 0.000011482471  | EGFR, AKT1, MAPK14, MAPK3, ADCY1, PRKCB, GSK3B                        |

|         |          |                                           |                  |                 |                 |                                                                                                              |
|---------|----------|-------------------------------------------|------------------|-----------------|-----------------|--------------------------------------------------------------------------------------------------------------|
|         | hsa01521 | EGFR tyrosine kinase inhibitor resistance | 0.0000028361704  | 0.000043197056  | 0.000011482471  | EGFR, AKT1, MAPK3, PRKCB, GSK3B                                                                              |
|         | hsa04261 | Adrenergic signaling in cardiomyocytes    | 0.0000037002396  | 0.000052137019  | 0.000013858857  | CAMK2A, AKT1, MAPK14, MAPK3, PIK3R6, ADCY1                                                                   |
|         | hsa04020 | Calcium signaling pathway                 | 0.0000040954460  | 0.000052137019  | 0.000013858857  | EGFR, CAMK2A, NOS2, CHRM1, ADCY1, CHRM2, PRKCB                                                               |
| Ethanol | hsa04725 | Cholinergic synapse                       | 0.0000000000000  | 0.0000000000002 | 0.0000000000001 | CHRM2, ADCY1, AKT1, PIK3CG, CACNA1D, PRKCA, CACNA1A, ACHE, PIK3CB, PRKCB, CAMK2B, ITPR1, CAMK2A              |
|         | hsa04020 | Calcium signaling pathway                 | 0.00000000000005 | 0.0000000000062 | 0.0000000000021 | CHRM2, EGFR, ADCY1, MYLK, AGTR1, CACNA1D, ADRB1, PRKCA, CACNA1A, EDNRA, PRKCB, ADRA1A, CAMK2B, ITPR1, CAMK2A |
|         | hsa04912 | GnRH signaling pathway                    | 0.00000000000010 | 0.0000000000079 | 0.0000000000027 | EGFR, ADCY1, MMP2, CACNA1D, PRKCA, PRKCD, MAP2K4, PRKCB, CAMK2B, ITPR1, CAMK2A                               |
|         | hsa04728 | Dopaminergic synapse                      | 0.00000000000021 | 0.0000000000100 | 0.0000000000034 | COMT, AKT1, CACNA1D, PRKCA, CACNA1A, MAOA, MAOB, PRKCB, GSK3B, CAMK2B, ITPR1, CAMK2A                         |
|         | hsa05417 | Lipid and atherosclerosis                 | 0.00000000000022 | 0.0000000000100 | 0.0000000000034 | MMP1, MMP9, CASP8, PPARG, AKT1, PRKCA, PIK3CB, PTK2, LYN, MAP2K4, GSK3B, CAMK2B, ITPR1, CAMK2A               |
|         | hsa04012 | ErbB signaling pathway                    | 0.00000000000134 | 0.0000000000506 | 0.0000000000174 | EGFR, AKT1, PRKCA, PIK3CB, PTK2, MAP2K4, PRKCB, GSK3B, CAMK2B, CAMK2A                                        |

|  |          |                                                |                 |                |                |                                                                                 |
|--|----------|------------------------------------------------|-----------------|----------------|----------------|---------------------------------------------------------------------------------|
|  | hsa04270 | Vascular smooth muscle contraction             | 0.0000000000559 | 0.000000001805 | 0.000000000622 | ADCY1, MYLK, PLA2G2A, AGTR1, CACNA1D, PRKCA, PRKCD, EDNRA, PRKCB, ADRA1A, ITPR1 |
|  | hsa04935 | Growth hormone synthesis, secretion and action | 0.0000000004024 | 0.000000011367 | 0.000000003918 | ADCY1, AKT1, CACNA1D, PRKCA, PIK3CB, PTK2, MAP2K4, PRKCB, GSK3B, ITPR1          |
|  | hsa04022 | cGMP-PKG signaling pathway                     | 0.0000000006595 | 0.000000016561 | 0.000000005708 | ADCY1, MYLK, AKT1, AGTR1, PIK3CG, ADORA1, CACNA1D, ADRB1, EDNRA, ADRA1A, ITPR1  |
|  | hsa04261 | Adrenergic signaling in cardiomyocytes         | 0.0000000039381 | 0.000000089001 | 0.000000030676 | ADCY1, AKT1, AGTR1, PIK3CG, CACNA1D, ADRB1, PRKCA, ADRA1A, CAMK2B, CAMK2A       |
|  | hsa04971 | Gastric acid secretion                         | 0.0000000045438 | 0.000000091358 | 0.000000031488 | CFTR, ADCY1, MYLK, PRKCA, PRKCB, CAMK2B, ITPR1, CAMK2A                          |
|  | hsa04921 | Oxytocin signaling pathway                     | 0.0000000050885 | 0.000000091358 | 0.000000031488 | EGFR, ADCY1, MYLK, PIK3CG, CACNA1D, PRKCA, PRKCB, CAMK2B, ITPR1, CAMK2A         |
|  | hsa05415 | Diabetic cardiomyopathy                        | 0.0000000052551 | 0.000000091358 | 0.000000031488 | MMP9, AKT1, MMP2, AGTR1, PRKCA, PRKCD, PIK3CB, PRKCB, GSK3B, CAMK2B, CAMK2A     |
|  | hsa05205 | Proteoglycans in cancer                        | 0.0000000058264 | 0.000000094055 | 0.000000032418 | EGFR, MMP9, AKT1, MMP2, PRKCA, PIK3CB, PTK2, PRKCB, CAMK2B, ITPR1, CAMK2A       |
|  | hsa04024 | cAMP signaling pathway                         | 0.0000000116480 | 0.000000175496 | 0.000000060488 | CHRM2, CFTR, ADCY1, AKT1, ADORA1, CACNA1D, ADRB1, PIK3CB, EDNRA, CAMK2B, CAMK2A |

|         |          |                            |                 |                |                |                                                                                                    |
|---------|----------|----------------------------|-----------------|----------------|----------------|----------------------------------------------------------------------------------------------------|
| Aqueous | hsa04020 | Calcium signaling pathway  | 0.0000000000022 | 0.000000000482 | 0.000000000174 | ADRB2, ADCY1, EGFR, MYLK, NOS2, CHRM2, PRKCA, CACNA1C, EDNRA, PLCG1, PRKCB, ADRA1A, CAMK2B, CAMK2A |
|         | hsa04725 | Cholinergic synapse        | 0.0000000000859 | 0.000000008004 | 0.000000002885 | ADCY1, AKT1, PIK3CG, CHRM2, PRKCA, ACHE, CACNA1C, PRKCB, CAMK2B, CAMK2A                            |
|         | hsa05205 | Proteoglycans in cancer    | 0.0000000001096 | 0.000000008004 | 0.000000002885 | TLR4, EGFR, MMP9, AKT1, CTNNB1, MMP2, PRKCA, PTK2, PLCG1, PRKCB, CAMK2B, CAMK2A                    |
|         | hsa04012 | ErbB signaling pathway     | 0.0000000001667 | 0.000000009129 | 0.000000003291 | EGFR, AKT1, PRKCA, PTK2, PLCG1, PRKCB, GSK3B, CAMK2B, CAMK2A                                       |
|         | hsa04912 | GnRH signaling pathway     | 0.0000000003791 | 0.000000016607 | 0.000000005987 | ADCY1, EGFR, MMP2, PRKCA, PRKCD, CACNA1C, PRKCB, CAMK2B, CAMK2A                                    |
|         | hsa04066 | HIF-1 signaling pathway    | 0.0000000015923 | 0.000000058019 | 0.000000020915 | TLR4, EGFR, NOS2, AKT1, PRKCA, PLCG1, PRKCB, CAMK2B, CAMK2A                                        |
|         | hsa04921 | Oxytocin signaling pathway | 0.0000000018545 | 0.000000058019 | 0.000000020915 | ADCY1, EGFR, MYLK, PIK3CG, PRKCA, CACNA1C, PRKCB, MYL9, CAMK2B, CAMK2A                             |
|         | hsa05417 | Lipid and atherosclerosis  | 0.0000000031721 | 0.000000086836 | 0.000000031304 | TLR4, MMP1, MMP9, AKT1, PRKCA, NFE2L2, PTK2, PLCG1, GSK3B, CAMK2B, CAMK2A                          |
|         | hsa04024 | cAMP signaling pathway     | 0.0000000038536 | 0.000000089581 | 0.000000032293 | ADRB2, ADCY1, CFTR, AKT1, ADORA1, CHRM2, CACNA1C, EDNRA, MYL9, CAMK2B, CAMK2A                      |
|         | hsa04022 | cGMP-PKG signaling pathway | 0.0000000040905 | 0.000000089581 | 0.000000032293 | ADRB2, ADCY1, MYLK, AKT1, PIK3CG, ADORA1,                                                          |

|          |                                        |                 |                |                |  |                                                                    |
|----------|----------------------------------------|-----------------|----------------|----------------|--|--------------------------------------------------------------------|
|          |                                        |                 |                |                |  | CACNA1C, EDNRA, MYL9, ADRA1A                                       |
| hsa04728 | Dopaminergic synapse                   | 0.0000000087673 | 0.000000171037 | 0.000000061657 |  | AKT1, PRKCA, MAOA, CACNA1C, MAOB, PRKCB, GSK3B, CAMK2B, CAMK2A     |
| hsa04270 | Vascular smooth muscle contraction     | 0.0000000093719 | 0.000000171037 | 0.000000061657 |  | ADCY1, MYLK, PRKCA, PRKCD, CACNA1C, EDNRA, PRKCB, MYL9, ADRA1A     |
| hsa04261 | Adrenergic signaling in cardiomyocytes | 0.0000000269707 | 0.000000454353 | 0.000000163790 |  | ADRB2, ADCY1, AKT1, PIK3CG, PRKCA, CACNA1C, ADRA1A, CAMK2B, CAMK2A |
| hsa05031 | Amphetamine addiction                  | 0.0000000299054 | 0.000000467805 | 0.000000168639 |  | PRKCA, MAOA, CACNA1C, MAOB, PRKCB, CAMK2B, CAMK2A                  |
| hsa04670 | Leukocyte transendothelial migration   | 0.0000000521153 | 0.000000737460 | 0.000000265847 |  | MMP9, CTNNB1, MMP2, PRKCA, PTK2, PLCG1, PRKCB, MYL9                |



**Table S9. Network analysis of pathogenic target genes interaction with phytoconstituents**

| Name                      | Betweenness Centrality | Closeness Centrality | Degree | Topological Coefficient | Type               |
|---------------------------|------------------------|----------------------|--------|-------------------------|--------------------|
| Kaempferol                | 0.164589386            | 0.428571429          | 45     | 0.219047619             | Aqueous / Compound |
| Quercetin                 | 0.105479836            | 0.418032787          | 43     | 0.243181818             | Ethanol / Compound |
| Luteolin                  | 0.044343368            | 0.395348837          | 38     | 0.303125                | Ethanol / Compound |
| Apigenin                  | 0.060515748            | 0.401574803          | 38     | 0.279761905             | Ethanol / Compound |
| Linoleic acid             | 0.234119057            | 0.428571429          | 23     | 0.134387352             | Hexane / Compound  |
| myristic acid             | 0.096010199            | 0.366906475          | 15     | 0.2375                  | Hexane / Compound  |
| ACHE                      | 0.114814332            | 0.426778243          | 13     | 0.206410256             | Gene               |
| Umbelliferone             | 0.064350668            | 0.342281879          | 12     | 0.269230769             | DCM / Compound     |
| naringenin                | 0.100506145            | 0.366906475          | 12     | 0.18627451              | Ethanol / Compound |
| Narcissin                 | 0.049142433            | 0.364285714          | 12     | 0.25                    | Ethanol / Compound |
| Ferulic acid              | 0.095898682            | 0.380597015          | 12     | 0.206140351             | Aqueous / Compound |
| Palmitic acid             | 0.038552936            | 0.34                 | 11     | 0.220779221             | Hexane / Compound  |
| Sitosterol                | 0.04039064             | 0.377777778          | 11     | 0.204545455             | DCM / Compound     |
| Ellagic acid              | 0.035192853            | 0.346938776          | 11     | 0.327272727             | Ethanol / Compound |
| Kaempferol 3-O-glucoside  | 0.035582615            | 0.383458647          | 11     | 0.268398268             | Aqueous / Compound |
| MMP2                      | 0.107282346            | 0.453333333          | 11     | 0.202898551             | Gene               |
| Stigmasterol              | 0.03958882             | 0.375                | 10     | 0.21                    | DCM / Compound     |
| MMP12                     | 0.084019614            | 0.43776824           | 10     | 0.204545455             | Gene               |
| MAOA                      | 0.039687733            | 0.382022472          | 9      | 0.273333333             | Gene               |
| ADORA1                    | 0.032324664            | 0.362989324          | 9      | 0.291989664             | Gene               |
| MMP9                      | 0.046543592            | 0.390804598          | 9      | 0.253668763             | Gene               |
| Scopoletin                | 0.031130828            | 0.34                 | 8      | 0.341666667             | Ethanol / Compound |
| 1,4-Dicaffeoylquinic acid | 0.050417519            | 0.351724138          | 8      | 0.3046875               | Ethanol / Compound |
| EGFR                      | 0.027792066            | 0.368231047          | 8      | 0.304347826             | Gene               |
| Arachidic acid            | 0.025626917            | 0.303571429          | 7      | 0.317460317             | Hexane / Compound  |
| GSK3B                     | 0.013677454            | 0.348122867          | 7      | 0.36996337              | Gene               |

|                      |             |             |   |             |                    |
|----------------------|-------------|-------------|---|-------------|--------------------|
| p coumaric acid      | 0.020127673 | 0.337748344 | 7 | 0.32967033  | Aqueous / Compound |
| Luteolin 7 glucoside | 0.018661413 | 0.364285714 | 7 | 0.293233083 | Aqueous / Compound |
| PPARD                | 0.022209439 | 0.338870432 | 6 | 0.328703704 | Gene               |
| CAMK2A               | 0.047660643 | 0.3878327   | 6 | 0.242424242 | Gene               |
| HSD11B1              | 0.031003551 | 0.350515464 | 6 | 0.280487805 | Gene               |
| CAMK2B               | 0.018089024 | 0.341137124 | 6 | 0.391891892 | Gene               |
| CSNK2A1              | 0.009041587 | 0.341137124 | 6 | 0.423423423 | Gene               |
| PRKCB                | 0.0181309   | 0.321766562 | 6 | 0.297619048 | Gene               |
| PTK2                 | 0.00668352  | 0.33442623  | 6 | 0.441176471 | Gene               |
| CHRM2                | 0.01765113  | 0.338870432 | 6 | 0.24537037  | Gene               |
| PRKCD                | 0.009309721 | 0.317757009 | 5 | 0.348148148 | Gene               |
| AKT1                 | 0.006835338 | 0.336633663 | 5 | 0.438888889 | Gene               |
| PTGER2               | 0.008555353 | 0.325878594 | 4 | 0.40625     | Gene               |
| Campesterol          | 0.005382978 | 0.316770186 | 4 | 0.392857143 | DCM / Compound     |
| CYP17A1              | 0.00602035  | 0.317757009 | 4 | 0.392857143 | Gene               |
| MAPK14               | 0.007632387 | 0.332247557 | 4 | 0.4         | Gene               |
| Orientin             | 0.02138255  | 0.316770186 | 4 | 0.3125      | Ethanol / Compound |
| CACNA1A              | 0.018028619 | 0.327974277 | 4 | 0.409090909 | Gene               |
| EDNRA                | 0.022550505 | 0.379182156 | 4 | 0.328703704 | Gene               |
| PRKCA                | 0.003246851 | 0.319749216 | 4 | 0.411290323 | Gene               |
| CXCR1                | 0.001267641 | 0.323809524 | 4 | 0.588709677 | Gene               |
| NOS2                 | 0.014960409 | 0.336633663 | 4 | 0.351351351 | Gene               |
| MYLK                 | 0.003633439 | 0.330097087 | 4 | 0.470588235 | Gene               |
| MMP1                 | 0.006852564 | 0.3081571   | 4 | 0.326086957 | Gene               |
| MPO                  | 0.001267641 | 0.323809524 | 4 | 0.588709677 | Gene               |
| ADCY1                | 0.014920046 | 0.357894737 | 4 | 0.364130435 | Gene               |
| KDM5C                | 0.001829939 | 0.287323944 | 3 | 0.555555556 | Gene               |
| GABBR1               | 0.001829939 | 0.287323944 | 3 | 0.555555556 | Gene               |
| SLC6A4               | 7.02E-04    | 0.279452055 | 3 | 0.666666667 | Gene               |
| CACNA1D              | 0.00350287  | 0.304477612 | 3 | 0.48        | Gene               |
| PPARG                | 0.008003625 | 0.299120235 | 3 | 0.454545455 | Gene               |
| ADRA1A               | 0.005292261 | 0.319749216 | 3 | 0.46875     | Gene               |
| MAOB                 | 0.00807439  | 0.3081571   | 3 | 0.371794872 | Gene               |
| RARB                 | 0.002395142 | 0.290598291 | 3 | 0.5         | Gene               |
| ALDH2                | 0.003929249 | 0.302670623 | 3 | 0.405797101 | Gene               |
| Hesperidin           | 0.001768142 | 0.326923077 | 3 | 0.488888889 | Aqueous / Compound |
| PIK3CG               | 0.001417712 | 0.311926606 | 3 | 0.512820513 | Gene               |
| IL2                  | 6.69E-04    | 0.290598291 | 3 | 0.5625      | Gene               |
| CFTR                 | 5.19E-04    | 0.313846154 | 3 | 0.666666667 | Gene               |
| RARA                 | 4.10E-04    | 0.284122563 | 2 | 0.705882353 | Gene               |
| PDE4A                | 0.001625097 | 0.315789474 | 2 | 0.620689655 | Gene               |

---

|         |             |             |   |             |      |
|---------|-------------|-------------|---|-------------|------|
| SLC5A7  | 0.003640602 | 0.317757009 | 2 | 0.55        | Gene |
| CHRM1   | 9.72E-04    | 0.293948127 | 2 | 0.558823529 | Gene |
| PIK3R6  | 0.003640602 | 0.317757009 | 2 | 0.55        | Gene |
| MAPK3   | 0.001310744 | 0.311926606 | 2 | 0.592592593 | Gene |
| ITPR1   | 7.35E-04    | 0.300884956 | 2 | 0.619047619 | Gene |
| PLCG1   | 0.001677764 | 0.313846154 | 2 | 0.535714286 | Gene |
| TLR4    | 5.35E-04    | 0.280991736 | 2 | 0.653846154 | Gene |
| GLUL    | 0           | 0.300884956 | 1 | 0           | Gene |
| SLC18A3 | 0           | 0.233409611 | 1 | 0           | Gene |
| THRA    | 0           | 0.269129288 | 1 | 0           | Gene |
| PTPN11  | 0           | 0.300884956 | 1 | 0           | Gene |
| PDE4D   | 0           | 0.300884956 | 1 | 0           | Gene |
| CHRNA3  | 0           | 0.300884956 | 1 | 0           | Gene |
| CNR1    | 0           | 0.300884956 | 1 | 0           | Gene |
| TRPV1   | 0           | 0.300884956 | 1 | 0           | Gene |
| IL6     | 0           | 0.300884956 | 1 | 0           | Gene |
| HDAC8   | 0           | 0.255639098 | 1 | 0           | Gene |
| HDAC2   | 0           | 0.255639098 | 1 | 0           | Gene |
| DYRK1A  | 0           | 0.269129288 | 1 | 0           | Gene |
| MAP2K4  | 0           | 0.241134752 | 1 | 0           | Gene |
| LYN     | 0           | 0.258227848 | 1 | 0           | Gene |
| PIK3CB  | 0           | 0.269129288 | 1 | 0           | Gene |
| INPP5E  | 0           | 0.287323944 | 1 | 0           | Gene |
| ADRB1   | 0           | 0.267716535 | 1 | 0           | Gene |
| AGTR1   | 0           | 0.295652174 | 1 | 0           | Gene |
| PLA2G2A | 0           | 0.269129288 | 1 | 0           | Gene |
| CASP8   | 0           | 0.260869565 | 1 | 0           | Gene |
| KIT     | 0           | 0.269129288 | 1 | 0           | Gene |
| COMT    | 0           | 0.25436409  | 1 | 0           | Gene |
| ELANE   | 0           | 0.260869565 | 1 | 0           | Gene |
| MYL9    | 0           | 0.300884956 | 1 | 0           | Gene |
| CACNA1C | 0           | 0.300884956 | 1 | 0           | Gene |
| NFE2L2  | 0           | 0.276422764 | 1 | 0           | Gene |
| CTNNB1  | 0           | 0.276422764 | 1 | 0           | Gene |
| TLR9    | 0           | 0.276422764 | 1 | 0           | Gene |
| ADRB2   | 0           | 0.300884956 | 1 | 0           | Gene |

**Table S10. Network analysis of pathogenic target genes interaction with phytoconstituents and GO biological process (BP).**

| Extract | Name                                                                                        |      | Closeness Centrality | Degree | Topological Coefficient | Type              |
|---------|---------------------------------------------------------------------------------------------|------|----------------------|--------|-------------------------|-------------------|
| Hexane  | G protein-coupled receptor signaling pathway, coupled to cyclic nucleotide second messenger | 0.04 | 0.47                 | 76.8   | 0.35                    | BP                |
|         | Linoleic acid                                                                               | 0.20 | 0.57                 | 33.6   | 0.35                    | Hexane / Compound |
|         | CNR1                                                                                        | 0.14 | 0.56                 | 29.4   | 0.36                    | Gene              |
|         | PPARD                                                                                       | 0.07 | 0.52                 | 23.1   | 0.34                    | Gene              |
|         | regulation of trans-synaptic signaling                                                      | 0.04 | 0.48                 | 18.9   | 0.40                    | BP                |
|         | modulation of chemical synaptic transmission                                                | 0.04 | 0.48                 | 18.9   | 0.40                    | BP                |
|         | response to molecule of bacterial origin                                                    | 0.03 | 0.48                 | 18.9   | 0.41                    | BP                |
|         | response to lipopolysaccharide                                                              | 0.03 | 0.48                 | 18.9   | 0.41                    | BP                |
|         | CHRM2                                                                                       | 0.04 | 0.45                 | 18.9   | 0.42                    | Gene              |
|         | regulation of neurotransmitter levels                                                       | 0.03 | 0.44                 | 18.9   | 0.44                    | BP                |
|         | ADCY1                                                                                       | 0.04 | 0.49                 | 18.9   | 0.38                    | Gene              |
|         | Palmitic acid                                                                               | 0.05 | 0.47                 | 16.8   | 0.35                    | Hexane / Compound |
|         | adenylate cyclase-modulating G protein-coupled receptor signaling pathway                   | 0.04 | 0.47                 | 16.8   | 0.35                    | BP                |
|         | neurotransmitter transport                                                                  | 0.02 | 0.43                 | 16.8   | 0.48                    | BP                |
|         | RARA                                                                                        | 0.04 | 0.45                 | 16.8   | 0.40                    | Gene              |
|         | NOS2                                                                                        | 0.02 | 0.44                 | 16.8   | 0.45                    | Gene              |
|         | PTGER2                                                                                      | 0.04 | 0.48                 | 16.8   | 0.37                    | Gene              |
|         | IL6                                                                                         | 0.02 | 0.44                 | 16.8   | 0.45                    | Gene              |
|         | CAMK2A                                                                                      | 0.03 | 0.48                 | 16.8   | 0.39                    | Gene              |
|         | GLUL                                                                                        | 0.03 | 0.46                 | 16.8   | 0.42                    | Gene              |
|         | myristic acid                                                                               | 0.03 | 0.42                 | 14.7   | 0.44                    | Hexane / Compound |
|         | cellular response to molecule of bacterial origin                                           | 0.01 | 0.42                 | 14.7   | 0.48                    | BP                |
|         | regulation of peptide hormone secretion                                                     | 0.02 | 0.45                 | 14.7   | 0.42                    | BP                |
|         | insulin secretion                                                                           | 0.02 | 0.45                 | 14.7   | 0.42                    | BP                |
|         | cellular response to lipopolysaccharide                                                     | 0.01 | 0.42                 | 14.7   | 0.48                    | BP                |
|         | CACNA1A                                                                                     | 0.03 | 0.43                 | 14.7   | 0.37                    | Gene              |
|         | regulation of insulin secretion                                                             | 0.02 | 0.45                 | 14.7   | 0.42                    | BP                |
|         | signal release from synapse                                                                 | 0.02 | 0.43                 | 14.7   | 0.48                    | BP                |
|         | neurotransmitter secretion                                                                  | 0.02 | 0.43                 | 14.7   | 0.48                    | BP                |
|         | PDE4D                                                                                       | 0.03 | 0.45                 | 14.7   | 0.43                    | Gene              |
|         | MAPK14                                                                                      | 0.02 | 0.46                 | 14.7   | 0.40                    | Gene              |
|         | CHRNA3                                                                                      | 0.02 | 0.45                 | 14.7   | 0.44                    | Gene              |
|         | Arachidic acid                                                                              | 0.02 | 0.43                 | 10.5   | 0.34                    | Hexane / Compound |
|         | GABBR1                                                                                      | 0.01 | 0.38                 | 10.5   | 0.48                    | Gene              |
|         | MAPK3                                                                                       | 0.01 | 0.40                 | 10.5   | 0.54                    | Gene              |
|         | SLC18A3                                                                                     | 0.01 | 0.37                 | 10.5   | 0.52                    | Gene              |
|         | SLC5A7                                                                                      | 0.01 | 0.41                 | 10.5   | 0.49                    | Gene              |
|         | PTPN11                                                                                      | 0.00 | 0.40                 | 8.4    | 0.52                    | Gene              |
|         | EDNRA                                                                                       | 0.01 | 0.43                 | 8.4    | 0.44                    | Gene              |
|         | ACHE                                                                                        | 0.00 | 0.42                 | 8.4    | 0.51                    | Gene              |
|         | CHRM1                                                                                       | 0.00 | 0.35                 | 6.3    | 0.64                    | Gene              |
| DCM     | GSK3B                                                                                       | 0.12 | 0.54                 | 27.3   | 0.35                    | Gene              |
|         | PRKCB                                                                                       | 0.08 | 0.52                 | 23.1   | 0.36                    | Gene              |

|         |                                                         |      |      |      |      |                    |
|---------|---------------------------------------------------------|------|------|------|------|--------------------|
|         | Sitosterol                                              | 0.09 | 0.49 | 21   | 0.33 | DCM / Compound     |
|         | CAMK2A                                                  | 0.05 | 0.47 | 21   | 0.42 | Gene               |
|         | Umbelliferone                                           | 0.07 | 0.45 | 18.9 | 0.41 | DCM / Compound     |
|         | Stigmasterol                                            | 0.08 | 0.48 | 18.9 | 0.31 | DCM / Compound     |
|         | peptidyl-serine modification                            | 0.04 | 0.46 | 18.9 | 0.44 | BP                 |
|         | peptidyl-serine phosphorylation                         | 0.04 | 0.46 | 18.9 | 0.44 | BP                 |
|         | CHRM2                                                   | 0.06 | 0.47 | 18.9 | 0.35 | Gene               |
|         | regulation of neurotransmitter levels                   | 0.06 | 0.48 | 18.9 | 0.42 | BP                 |
|         | SLC6A4                                                  | 0.07 | 0.48 | 18.9 | 0.35 | Gene               |
|         | regulation of DNA-binding transcription factor activity | 0.04 | 0.45 | 16.8 | 0.41 | BP                 |
|         | modulation of chemical synaptic transmission            | 0.04 | 0.48 | 16.8 | 0.45 | BP                 |
|         | rhythmic process                                        | 0.05 | 0.48 | 16.8 | 0.35 | BP                 |
|         | ADCY1                                                   | 0.03 | 0.45 | 16.8 | 0.42 | Gene               |
|         | neurotransmitter transport                              | 0.03 | 0.45 | 14.7 | 0.49 | BP                 |
|         | circadian rhythm                                        | 0.03 | 0.46 | 14.7 | 0.37 | BP                 |
|         | MAPK3                                                   | 0.04 | 0.45 | 14.7 | 0.38 | Gene               |
|         | AKT1                                                    | 0.03 | 0.41 | 14.7 | 0.47 | Gene               |
|         | EGFR                                                    | 0.03 | 0.46 | 14.7 | 0.39 | Gene               |
|         | neurotransmitter secretion                              | 0.02 | 0.44 | 12.6 | 0.49 | BP                 |
|         | placenta development                                    | 0.02 | 0.40 | 12.6 | 0.37 | BP                 |
|         | peptidyl-threonine modification                         | 0.01 | 0.43 | 12.6 | 0.49 | BP                 |
|         | peptidyl-threonine phosphorylation                      | 0.01 | 0.43 | 12.6 | 0.49 | BP                 |
|         | HDAC2                                                   | 0.02 | 0.43 | 12.6 | 0.38 | Gene               |
|         | PPARG                                                   | 0.02 | 0.44 | 12.6 | 0.41 | Gene               |
|         | CSNK2A1                                                 | 0.01 | 0.42 | 12.6 | 0.46 | Gene               |
|         | PRKCD                                                   | 0.02 | 0.42 | 12.6 | 0.48 | Gene               |
|         | ACHE                                                    | 0.03 | 0.43 | 12.6 | 0.39 | Gene               |
|         | response to dopamine                                    | 0.02 | 0.43 | 10.5 | 0.39 | BP                 |
|         | cellular response to dopamine                           | 0.02 | 0.43 | 10.5 | 0.39 | BP                 |
|         | MAPK14                                                  | 0.01 | 0.42 | 10.5 | 0.46 | Gene               |
|         | SLC5A7                                                  | 0.01 | 0.38 | 10.5 | 0.50 | Gene               |
|         | neurotransmitter metabolic process                      | 0.01 | 0.37 | 8.4  | 0.48 | BP                 |
|         | NOS2                                                    | 0.01 | 0.40 | 8.4  | 0.50 | Gene               |
|         | Campesterol                                             | 0.00 | 0.36 | 6.3  | 0.64 | DCM / Compound     |
|         | CHRM1                                                   | 0.00 | 0.36 | 6.3  | 0.48 | Gene               |
|         | PPARD                                                   | 0.01 | 0.37 | 6.3  | 0.61 | Gene               |
|         | MAOA                                                    | 0.01 | 0.37 | 6.3  | 0.53 | Gene               |
| Ethanol | Quercetin                                               | 0.08 | 0.48 | 90.3 | 0.31 | Ethanol / Compound |
|         | cellular calcium ion homeostasis                        | 0.03 | 0.46 | 87.3 | 0.35 | BP                 |
|         | regulation of neurotransmitter levels                   | 0.05 | 0.42 | 53.1 | 0.34 | BP                 |
|         | muscle system process                                   | 0.06 | 0.44 | 45.2 | 0.30 | BP                 |
|         | Narcissin                                               | 0.05 | 0.44 | 43.1 | 0.29 | Ethanol / Compound |
|         | ADORA1                                                  | 0.07 | 0.52 | 31.5 | 0.31 | Gene               |
|         | cellular divalent inorganic cation homeostasis          | 0.03 | 0.46 | 27.3 | 0.35 | BP                 |
|         | calcium ion homeostasis                                 | 0.03 | 0.46 | 27.3 | 0.35 | BP                 |
|         | regulation of trans-synaptic signaling                  | 0.04 | 0.46 | 27.3 | 0.36 | BP                 |
|         | modulation of chemical synaptic transmission            | 0.04 | 0.46 | 27.3 | 0.36 | BP                 |

|                                                   |      |      |      |      |                    |
|---------------------------------------------------|------|------|------|------|--------------------|
| Luteolin                                          | 0.03 | 0.45 | 25.2 | 0.35 | Ethanol / Compound |
| Apigenin                                          | 0.05 | 0.45 | 25.2 | 0.31 | Ethanol / Compound |
| PRKCB                                             | 0.07 | 0.48 | 25.2 | 0.27 | Gene               |
| CACNA1D                                           | 0.04 | 0.48 | 25.2 | 0.31 | Gene               |
| Ellagic acid                                      | 0.03 | 0.43 | 23.1 | 0.38 | Ethanol / Compound |
| regulation of inflammatory response               | 0.05 | 0.43 | 23.1 | 0.31 | BP                 |
| cellular response to peptide                      | 0.04 | 0.44 | 23.1 | 0.32 | BP                 |
| regulation of cytosolic calcium ion concentration | 0.02 | 0.42 | 23.1 | 0.44 | BP                 |
| regulation of blood circulation                   | 0.04 | 0.43 | 23.1 | 0.38 | BP                 |
| ADRA1A                                            | 0.04 | 0.47 | 23.1 | 0.32 | Gene               |
| GSK3B                                             | 0.04 | 0.44 | 23.1 | 0.34 | Gene               |
| naringenin                                        | 0.06 | 0.42 | 21   | 0.26 | Ethanol / Compound |
| PIK3CG                                            | 0.03 | 0.45 | 21   | 0.34 | Gene               |
| EGFR                                              | 0.03 | 0.46 | 21   | 0.32 | Gene               |
| PTK2                                              | 0.03 | 0.44 | 18.9 | 0.31 | Gene               |
| AKT1                                              | 0.03 | 0.44 | 18.9 | 0.30 | Gene               |
| LYN                                               | 0.02 | 0.42 | 18.9 | 0.36 | Gene               |
| AGTR1                                             | 0.02 | 0.43 | 18.9 | 0.37 | Gene               |
| CACNA1A                                           | 0.02 | 0.42 | 18.9 | 0.41 | Gene               |
| ACHE                                              | 0.02 | 0.43 | 18.9 | 0.37 | Gene               |
| Scopoletin                                        | 0.03 | 0.41 | 16.8 | 0.30 | Ethanol / Compound |
| phosphatidylinositol 3-kinase signaling           | 0.03 | 0.41 | 16.8 | 0.31 | BP                 |
| positive regulation of lipid metabolic process    | 0.02 | 0.41 | 16.8 | 0.36 | BP                 |
| peptidyl-threonine modification                   | 0.02 | 0.42 | 16.8 | 0.29 | BP                 |
| peptidyl-threonine phosphorylation                | 0.02 | 0.42 | 16.8 | 0.29 | BP                 |
| CAMK2B                                            | 0.02 | 0.42 | 16.8 | 0.37 | Gene               |
| PRKCD                                             | 0.02 | 0.40 | 14.7 | 0.30 | Gene               |
| ITPR1                                             | 0.01 | 0.40 | 14.7 | 0.43 | Gene               |
| CXCR1                                             | 0.01 | 0.39 | 14.7 | 0.50 | Gene               |
| IL2                                               | 0.01 | 0.39 | 14.7 | 0.43 | Gene               |
| CAMK2A                                            | 0.02 | 0.39 | 14.7 | 0.35 | Gene               |
| MAOA                                              | 0.01 | 0.41 | 14.7 | 0.37 | Gene               |
| CSNK2A1                                           | 0.01 | 0.39 | 12.6 | 0.40 | Gene               |
| EDNRA                                             | 0.01 | 0.38 | 12.6 | 0.46 | Gene               |
| KIT                                               | 0.01 | 0.40 | 12.6 | 0.35 | Gene               |
| CHRM2                                             | 0.01 | 0.41 | 12.6 | 0.41 | Gene               |
| MMP9                                              | 0.01 | 0.38 | 10.5 | 0.41 | Gene               |
| ELANE                                             | 0.01 | 0.35 | 10.5 | 0.58 | Gene               |
| ADCY1                                             | 0.00 | 0.37 | 10.5 | 0.49 | Gene               |
| Orientin                                          | 0.01 | 0.35 | 8.4  | 0.42 | Ethanol / Compound |
| 1,4-Dicaffeoylquinic acid                         | 0.01 | 0.36 | 8.4  | 0.39 | Ethanol / Compound |
| PPARG                                             | 0.01 | 0.37 | 8.4  | 0.38 | Gene               |
| PRKCA                                             | 0.01 | 0.36 | 8.4  | 0.40 | Gene               |
| MYLK                                              | 0.00 | 0.38 | 6.3  | 0.47 | Gene               |
| DYRK1A                                            | 0.00 | 0.34 | 6.3  | 0.48 | Gene               |
| MAOB                                              | 0.00 | 0.35 | 6.3  | 0.43 | Gene               |
| PLA2G2A                                           | 0.00 | 0.33 | 4.2  | 0.56 | Gene               |

|         |                                              |      |      |      |      |                    |
|---------|----------------------------------------------|------|------|------|------|--------------------|
| Aqueous | PIK3CB                                       | 0.00 | 0.32 | 4.2  | 0.53 | Gene               |
|         | INPP5E                                       | 0.00 | 0.33 | 4.2  | 0.56 | Gene               |
|         | MAP2K4                                       | 0.00 | 0.32 | 4.2  | 0.54 | Gene               |
|         | ADRB1                                        | 0.00 | 0.34 | 4.2  | 0.59 | Gene               |
|         | COMT                                         | 0.00 | 0.32 | 4.2  | 0.65 | Gene               |
|         | Kaempferol                                   | 0.26 | 0.57 | 94.5 | 0.26 | Aqueous / Compound |
|         | ADORA1                                       | 0.06 | 0.49 | 43.1 | 0.30 | Gene               |
|         | muscle system process                        | 0.04 | 0.43 | 25.2 | 0.31 | BP                 |
|         | regulation of trans-synaptic signaling       | 0.04 | 0.45 | 25.2 | 0.33 | BP                 |
|         | modulation of chemical synaptic transmission | 0.04 | 0.45 | 25.2 | 0.33 | BP                 |
|         | Kaempferol 3-O-glucoside                     | 0.06 | 0.45 | 23.1 | 0.31 | Aqueous / Compound |
|         | regulation of metal ion transport            | 0.04 | 0.45 | 23.1 | 0.30 | BP                 |
|         | Ferulic acid                                 | 0.05 | 0.40 | 21   | 0.29 | Aqueous / Compound |
|         | calcium ion transport                        | 0.03 | 0.42 | 21   | 0.32 | BP                 |
|         | cellular response to peptide                 | 0.04 | 0.43 | 21   | 0.33 | BP                 |
|         | regulation of peptide secretion              | 0.06 | 0.44 | 21   | 0.25 | BP                 |
|         | cellular response to chemical stress         | 0.03 | 0.41 | 21   | 0.33 | BP                 |
|         | regulation of muscle system process          | 0.02 | 0.41 | 21   | 0.36 | BP                 |
|         | CAMK2A                                       | 0.04 | 0.49 | 21   | 0.31 | Gene               |
|         | cellular response to oxidative stress        | 0.02 | 0.40 | 18.9 | 0.35 | BP                 |
|         | regulation of neurotransmitter levels        | 0.04 | 0.41 | 18.9 | 0.33 | BP                 |
|         | PRKCA                                        | 0.04 | 0.46 | 18.9 | 0.30 | Gene               |
|         | MMP9                                         | 0.04 | 0.47 | 16.8 | 0.28 | Gene               |
|         | AKT1                                         | 0.03 | 0.45 | 16.8 | 0.32 | Gene               |
|         | GSK3B                                        | 0.03 | 0.44 | 16.8 | 0.34 | Gene               |
|         | PRKCB                                        | 0.02 | 0.43 | 16.8 | 0.31 | Gene               |
|         | EGFR                                         | 0.04 | 0.47 | 16.8 | 0.33 | Gene               |
|         | ADRB2                                        | 0.03 | 0.45 | 16.8 | 0.36 | Gene               |
|         | ERBB signaling pathway                       | 0.01 | 0.41 | 14.7 | 0.37 | BP                 |
|         | peptidyl-threonine modification              | 0.01 | 0.40 | 14.7 | 0.38 | BP                 |
|         | peptidyl-threonine phosphorylation           | 0.01 | 0.40 | 14.7 | 0.38 | BP                 |
|         | MMP2                                         | 0.03 | 0.46 | 14.7 | 0.29 | Gene               |
|         | TLR4                                         | 0.02 | 0.42 | 14.7 | 0.28 | Gene               |
|         | CAMK2B                                       | 0.01 | 0.43 | 14.7 | 0.43 | Gene               |
|         | ADRA1A                                       | 0.02 | 0.43 | 14.7 | 0.40 | Gene               |
|         | PLCG1                                        | 0.02 | 0.43 | 14.7 | 0.36 | Gene               |
|         | ACHE                                         | 0.03 | 0.45 | 14.7 | 0.34 | Gene               |
|         | PRKCD                                        | 0.01 | 0.38 | 12.6 | 0.38 | Gene               |
|         | response to amyloid-beta                     | 0.01 | 0.41 | 12.6 | 0.32 | BP                 |
|         | MYLK                                         | 0.02 | 0.45 | 12.6 | 0.38 | Gene               |
|         | CACNA1C                                      | 0.02 | 0.44 | 12.6 | 0.38 | Gene               |
|         | CHRM2                                        | 0.01 | 0.38 | 12.6 | 0.41 | Gene               |
|         | Luteolin 7 glucoside                         | 0.01 | 0.37 | 10.5 | 0.41 | Aqueous / Compound |
|         | CTNNB1                                       | 0.01 | 0.38 | 10.5 | 0.41 | Gene               |
|         | PTK2                                         | 0.01 | 0.42 | 10.5 | 0.40 | Gene               |
|         | PIK3CG                                       | 0.01 | 0.38 | 10.5 | 0.45 | Gene               |
|         | ADCY1                                        | 0.01 | 0.42 | 10.5 | 0.43 | Gene               |
|         | p coumaric acid                              | 0.00 | 0.36 | 8.4  | 0.48 | Aqueous / Compound |
|         | NFE2L2                                       | 0.00 | 0.35 | 8.4  | 0.46 | Gene               |
|         | MMP12                                        | 0.01 | 0.40 | 8.4  | 0.33 | Gene               |

|  |            |      |      |     |      |                    |
|--|------------|------|------|-----|------|--------------------|
|  | TLR9       | 0.01 | 0.38 | 8.4 | 0.39 | Gene               |
|  | Hesperidin | 0.00 | 0.35 | 6.3 | 0.50 | Aqueous / Compound |
|  | IL2        | 0.00 | 0.35 | 6.3 | 0.45 | Gene               |
|  | CSNK2A1    | 0.00 | 0.38 | 6.3 | 0.47 | Gene               |
|  | MPO        | 0.00 | 0.40 | 6.3 | 0.49 | Gene               |
|  | MAOA       | 0.01 | 0.42 | 6.3 | 0.43 | Gene               |
|  | MYL9       | 0.00 | 0.38 | 6.3 | 0.57 | Gene               |
|  | NOS2       | 0.00 | 0.33 | 4.2 | 0.60 | Gene               |
|  | CFTR       | 0.00 | 0.39 | 4.2 | 0.59 | Gene               |
|  | MAOB       | 0.00 | 0.34 | 4.2 | 0.53 | Gene               |
|  | EDNRA      | 0.00 | 0.38 | 4.2 | 0.68 | Gene               |

**Table S11. Network analysis of pathogenic target genes interaction with phytoconstituents and KEGG pathway.**

| Fraction | Name                                             | Betweenness Centrality | Closeness Centrality | Degree | Topological Coefficient | Type              |
|----------|--------------------------------------------------|------------------------|----------------------|--------|-------------------------|-------------------|
| Hexane   | Cholinergic synapse                              | 0.11                   | 0.48                 | 47.6   | 0.26                    | KEGG              |
|          | Linoleic acid                                    | 0.27                   | 0.56                 | 44.8   | 0.25                    | Hexane / Compound |
|          | Neuroactive ligand-receptor interaction          | 0.05                   | 0.40                 | 44.4   | 0.31                    | KEGG              |
|          | cAMP signaling pathway                           | 0.06                   | 0.47                 | 36     | 0.33                    | KEGG              |
|          | ADCY1                                            | 0.11                   | 0.53                 | 20.8   | 0.26                    | Gene              |
|          | MAPK14                                           | 0.10                   | 0.52                 | 19.2   | 0.24                    | Gene              |
|          | MAPK3                                            | 0.10                   | 0.52                 | 19.2   | 0.26                    | Gene              |
|          | myristic acid                                    | 0.09                   | 0.47                 | 16     | 0.27                    | Hexane / Compound |
|          | CAMK2A                                           | 0.05                   | 0.48                 | 14.4   | 0.30                    | Gene              |
|          | Palmitic acid                                    | 0.04                   | 0.44                 | 11.2   | 0.33                    | Hexane / Compound |
|          | MMP2                                             | 0.03                   | 0.44                 | 11.2   | 0.32                    | Gene              |
|          | GABBR1                                           | 0.04                   | 0.42                 | 11.2   | 0.33                    | Gene              |
|          | PTGER2                                           | 0.05                   | 0.47                 | 11.2   | 0.32                    | Gene              |
|          | Calcium signaling pathway                        | 0.03                   | 0.44                 | 11.2   | 0.33                    | KEGG              |
|          | Proteoglycans in cancer                          | 0.02                   | 0.41                 | 9.6    | 0.46                    | KEGG              |
|          | Estrogen signaling pathway                       | 0.03                   | 0.43                 | 9.6    | 0.38                    | KEGG              |
|          | Relaxin signaling pathway                        | 0.02                   | 0.42                 | 9.6    | 0.50                    | KEGG              |
|          | CACNA1A                                          | 0.03                   | 0.44                 | 9.6    | 0.27                    | Gene              |
|          | Adrenergic signaling in cardiomyocytes           | 0.01                   | 0.41                 | 8      | 0.55                    | KEGG              |
|          | Retrograde endocannabinoid signaling             | 0.02                   | 0.42                 | 8      | 0.46                    | KEGG              |
|          | Chagas disease                                   | 0.01                   | 0.41                 | 8      | 0.50                    | KEGG              |
|          | Inflammatory mediator regulation of TRP channels | 0.01                   | 0.42                 | 8      | 0.43                    | KEGG              |
|          | Endocrine resistance                             | 0.01                   | 0.41                 | 8      | 0.55                    | KEGG              |
|          | GnRH signaling pathway                           | 0.01                   | 0.41                 | 8      | 0.60                    | KEGG              |
|          | Morphine addiction                               | 0.01                   | 0.41                 | 8      | 0.35                    | KEGG              |



|     |                                                |      |      |      |      |                   |
|-----|------------------------------------------------|------|------|------|------|-------------------|
|     | NOS2                                           | 0.02 | 0.42 | 8    | 0.33 | Gene              |
|     | MMP9                                           | 0.01 | 0.37 | 8    | 0.40 | Gene              |
|     | EDNRA                                          | 0.02 | 0.44 | 8    | 0.41 | Gene              |
|     | CHRM2                                          | 0.01 | 0.42 | 8    | 0.37 | Gene              |
|     | CHRM1                                          | 0.01 | 0.42 | 8    | 0.37 | Gene              |
|     | Arachidic acid                                 | 0.01 | 0.37 | 6.4  | 0.41 | Hexane / Compound |
|     | Pertussis                                      | 0.01 | 0.39 | 6.4  | 0.47 | KEGG              |
|     | PDE4A                                          | 0.01 | 0.44 | 6.4  | 0.41 | Gene              |
|     | IL6                                            | 0.00 | 0.38 | 4.8  | 0.47 | Gene              |
|     | RARA                                           | 0.00 | 0.36 | 4.8  | 0.48 | Gene              |
|     | CNR1                                           | 0.01 | 0.41 | 4.8  | 0.44 | Gene              |
|     | TRPV1                                          | 0.01 | 0.40 | 4.8  | 0.46 | Gene              |
|     | PDE4D                                          | 0.01 | 0.40 | 4.8  | 0.48 | Gene              |
|     | PIK3R6                                         | 0.01 | 0.40 | 4.8  | 0.49 | Gene              |
|     | CHRNA3                                         | 0.01 | 0.42 | 4.8  | 0.51 | Gene              |
|     | PTPN11                                         | 0.00 | 0.38 | 3.2  | 0.61 | Gene              |
|     | THRA                                           | 0.00 | 0.35 | 3.2  | 0.61 | Gene              |
|     | SLC18A3                                        | 0.00 | 0.34 | 3.2  | 0.54 | Gene              |
|     | SLC5A7                                         | 0.00 | 0.40 | 3.2  | 0.64 | Gene              |
|     | ACHE                                           | 0.00 | 0.40 | 3.2  | 0.64 | Gene              |
| DCM | Cholinergic synapse                            | 0.14 | 0.52 | 56   | 0.38 | KEGG              |
|     | Adrenergic signaling in cardiomyocytes         | 0.02 | 0.44 | 29.6 | 0.56 | KEGG              |
|     | MAPK3                                          | 0.11 | 0.56 | 22.4 | 0.36 | Gene              |
|     | AKT1                                           | 0.11 | 0.57 | 22.4 | 0.33 | Gene              |
|     | Chemokine signaling pathway                    | 0.03 | 0.47 | 21.2 | 0.51 | KEGG              |
|     | PRKCB                                          | 0.12 | 0.56 | 20.8 | 0.36 | Gene              |
|     | CAMK2A                                         | 0.06 | 0.49 | 16   | 0.38 | Gene              |
|     | GSK3B                                          | 0.04 | 0.44 | 14.4 | 0.44 | Gene              |
|     | MAPK14                                         | 0.04 | 0.47 | 14.4 | 0.38 | Gene              |
|     | EGFR                                           | 0.04 | 0.47 | 14.4 | 0.38 | Gene              |
|     | ADCY1                                          | 0.05 | 0.48 | 14.4 | 0.41 | Gene              |
|     | Sitosterol                                     | 0.07 | 0.48 | 12.8 | 0.38 | DCM / Compound    |
|     | Umbelliferone                                  | 0.07 | 0.45 | 12.8 | 0.43 | DCM / Compound    |
|     | Stigmasterol                                   | 0.05 | 0.45 | 11.2 | 0.29 | DCM / Compound    |
|     | Calcium signaling pathway                      | 0.05 | 0.47 | 11.2 | 0.39 | KEGG              |
|     | Human cytomegalovirus infection                | 0.02 | 0.47 | 11.2 | 0.59 | KEGG              |
|     | GnRH signaling pathway                         | 0.03 | 0.47 | 11.2 | 0.52 | KEGG              |
|     | Dopaminergic synapse                           | 0.04 | 0.45 | 9.6  | 0.50 | KEGG              |
|     | Relaxin signaling pathway                      | 0.02 | 0.45 | 9.6  | 0.53 | KEGG              |
|     | Growth hormone synthesis, secretion and action | 0.01 | 0.45 | 9.6  | 0.61 | KEGG              |
|     | Neurotrophin signaling pathway                 | 0.02 | 0.45 | 9.6  | 0.54 | KEGG              |

|         |                                           |      |      |      |      |                    |
|---------|-------------------------------------------|------|------|------|------|--------------------|
|         | HIF-1 signaling pathway                   | 0.02 | 0.45 | 9.6  | 0.58 | KEGG               |
|         | ErbB signaling pathway                    | 0.01 | 0.45 | 9.6  | 0.62 | KEGG               |
|         | EGFR tyrosine kinase inhibitor resistance | 0.01 | 0.44 | 8    | 0.64 | KEGG               |
|         | Glioma                                    | 0.01 | 0.44 | 8    | 0.65 | KEGG               |
|         | Prolactin signaling pathway               | 0.03 | 0.44 | 8    | 0.53 | KEGG               |
|         | NOS2                                      | 0.02 | 0.40 | 8    | 0.48 | Gene               |
|         | PRKCD                                     | 0.02 | 0.42 | 8    | 0.43 | Gene               |
|         | CHRM2                                     | 0.03 | 0.42 | 8    | 0.43 | Gene               |
|         | CYP17A1                                   | 0.02 | 0.38 | 6.4  | 0.48 | Gene               |
|         | ACHE                                      | 0.02 | 0.40 | 6.4  | 0.46 | Gene               |
|         | PIK3R6                                    | 0.01 | 0.41 | 6.4  | 0.48 | Gene               |
|         | Campesterol                               | 0.00 | 0.32 | 4.8  | 0.67 | DCM / Compound     |
|         | CHRM1                                     | 0.01 | 0.39 | 4.8  | 0.54 | Gene               |
|         | MAOA                                      | 0.00 | 0.35 | 3.2  | 0.67 | Gene               |
|         | SLC5A7                                    | 0.00 | 0.38 | 3.2  | 0.67 | Gene               |
| Ethanol | Quercetin                                 | 0.07 | 0.49 | 65.6 | 0.33 | Ethanol / Compound |
|         | Cholinergic synapse                       | 0.04 | 0.46 | 60.8 | 0.42 | KEGG               |
|         | Calcium signaling pathway                 | 0.06 | 0.48 | 56.5 | 0.37 | KEGG               |
|         | Adrenergic signaling in cardiomyocytes    | 0.02 | 0.43 | 56   | 0.45 | KEGG               |
|         | cAMP signaling pathway                    | 0.03 | 0.44 | 47.6 | 0.39 | KEGG               |
|         | cGMP-PKG signaling pathway                | 0.03 | 0.44 | 37.6 | 0.35 | KEGG               |
|         | CAMK2B                                    | 0.07 | 0.54 | 27.2 | 0.31 | Gene               |
|         | Lipid and atherosclerosis                 | 0.11 | 0.47 | 22.4 | 0.32 | KEGG               |
|         | PRKCB                                     | 0.06 | 0.50 | 22.4 | 0.29 | Gene               |
|         | PRKCA                                     | 0.05 | 0.52 | 22.4 | 0.30 | Gene               |
|         | CAMK2A                                    | 0.04 | 0.50 | 20.8 | 0.30 | Gene               |
|         | ITPR1                                     | 0.05 | 0.51 | 20.8 | 0.31 | Gene               |
|         | CACNA1D                                   | 0.05 | 0.49 | 20.8 | 0.32 | Gene               |
|         | AKT1                                      | 0.04 | 0.50 | 20.8 | 0.32 | Gene               |
|         | Luteolin                                  | 0.03 | 0.46 | 19.2 | 0.36 | Ethanol / Compound |
|         | Dopaminergic synapse                      | 0.06 | 0.46 | 19.2 | 0.41 | KEGG               |
|         | Apigenin                                  | 0.03 | 0.44 | 17.6 | 0.33 | Ethanol / Compound |
|         | Proteoglycans in cancer                   | 0.02 | 0.45 | 17.6 | 0.45 | KEGG               |
|         | Diabetic cardiomyopathy                   | 0.03 | 0.45 | 17.6 | 0.41 | KEGG               |
|         | Vascular smooth muscle contraction        | 0.04 | 0.44 | 17.6 | 0.35 | KEGG               |
|         | GnRH signaling pathway                    | 0.03 | 0.45 | 17.6 | 0.44 | KEGG               |
|         | ADCY1                                     | 0.02 | 0.45 | 17.6 | 0.35 | Gene               |
|         | Narcissin                                 | 0.03 | 0.44 | 16   | 0.34 | Ethanol / Compound |
|         | Ellagic acid                              | 0.03 | 0.43 | 16   | 0.37 | Ethanol / Compound |

|         |                                                |      |      |      |      |                    |
|---------|------------------------------------------------|------|------|------|------|--------------------|
|         | Oxytocin signaling pathway                     | 0.02 | 0.44 | 16   | 0.47 | KEGG               |
|         | Growth hormone synthesis, secretion and action | 0.02 | 0.44 | 16   | 0.43 | KEGG               |
|         | ErbB signaling pathway                         | 0.02 | 0.44 | 16   | 0.45 | KEGG               |
|         | GSK3B                                          | 0.03 | 0.46 | 16   | 0.34 | Gene               |
|         | EGFR                                           | 0.02 | 0.45 | 16   | 0.35 | Gene               |
|         | naringenin                                     | 0.04 | 0.42 | 14.4 | 0.24 | Ethanol / Compound |
|         | PTK2                                           | 0.02 | 0.45 | 14.4 | 0.34 | Gene               |
|         | Scopoletin                                     | 0.02 | 0.41 | 12.8 | 0.35 | Ethanol / Compound |
|         | Gastric acid secretion                         | 0.01 | 0.42 | 12.8 | 0.48 | KEGG               |
|         | MMP2                                           | 0.02 | 0.45 | 12.8 | 0.32 | Gene               |
|         | PIK3CB                                         | 0.02 | 0.45 | 12.8 | 0.33 | Gene               |
|         | ADORA1                                         | 0.02 | 0.43 | 11.2 | 0.36 | Gene               |
|         | MMP9                                           | 0.01 | 0.41 | 11.2 | 0.39 | Gene               |
|         | MAOA                                           | 0.01 | 0.41 | 11.2 | 0.38 | Gene               |
|         | MYLK                                           | 0.01 | 0.41 | 11.2 | 0.41 | Gene               |
|         | ACHE                                           | 0.01 | 0.42 | 11.2 | 0.37 | Gene               |
|         | 1,4-Dicaffeoylquinic acid                      | 0.02 | 0.39 | 9.6  | 0.30 | Ethanol / Compound |
|         | ADRA1A                                         | 0.01 | 0.41 | 9.6  | 0.36 | Gene               |
|         | AGTR1                                          | 0.01 | 0.40 | 9.6  | 0.44 | Gene               |
|         | PIK3CG                                         | 0.01 | 0.40 | 9.6  | 0.43 | Gene               |
|         | MAP2K4                                         | 0.00 | 0.36 | 8    | 0.46 | Gene               |
|         | PRKCD                                          | 0.01 | 0.40 | 8    | 0.34 | Gene               |
|         | EDNRA                                          | 0.01 | 0.39 | 8    | 0.43 | Gene               |
|         | ADRB1                                          | 0.00 | 0.38 | 8    | 0.47 | Gene               |
|         | CACNA1A                                        | 0.00 | 0.40 | 8    | 0.46 | Gene               |
|         | Orientin                                       | 0.00 | 0.38 | 6.4  | 0.59 | Ethanol / Compound |
|         | CFTR                                           | 0.00 | 0.37 | 6.4  | 0.43 | Gene               |
|         | CHRM2                                          | 0.00 | 0.39 | 6.4  | 0.51 | Gene               |
|         | MAOB                                           | 0.00 | 0.36 | 4.8  | 0.41 | Gene               |
|         | PLA2G2A                                        | 0.00 | 0.33 | 3.2  | 0.60 | Gene               |
|         | LYN                                            | 0.00 | 0.35 | 3.2  | 0.58 | Gene               |
|         | PPARG                                          | 0.00 | 0.35 | 3.2  | 0.53 | Gene               |
|         | CASP8                                          | 0.00 | 0.34 | 3.2  | 0.56 | Gene               |
|         | MMP1                                           | 0.00 | 0.34 | 3.2  | 0.56 | Gene               |
|         | COMT                                           | 0.00 | 0.33 | 3.2  | 0.64 | Gene               |
| Aqueous | Kaempferol                                     | 0.19 | 0.56 | 65.6 | 0.32 | Aqueous / Compound |
|         | Calcium signaling pathway                      | 0.08 | 0.49 | 54.4 | 0.38 | KEGG               |
|         | Cholinergic synapse                            | 0.03 | 0.44 | 36   | 0.49 | KEGG               |
|         | PRKCA                                          | 0.10 | 0.56 | 25.6 | 0.30 | Gene               |
|         | CAMK2A                                         | 0.06 | 0.54 | 22.4 | 0.33 | Gene               |
|         | CAMK2B                                         | 0.05 | 0.53 | 20.8 | 0.33 | Gene               |

|  |                                        |      |      |      |      |                    |
|--|----------------------------------------|------|------|------|------|--------------------|
|  | Proteoglycans in cancer                | 0.05 | 0.46 | 19.2 | 0.42 | KEGG               |
|  | PRKCB                                  | 0.04 | 0.49 | 19.2 | 0.32 | Gene               |
|  | cAMP signaling pathway                 | 0.04 | 0.44 | 17.6 | 0.37 | KEGG               |
|  | Lipid and atherosclerosis              | 0.07 | 0.45 | 17.6 | 0.37 | KEGG               |
|  | CACNA1C                                | 0.03 | 0.47 | 17.6 | 0.38 | Gene               |
|  | Kaempferol 3-O-glucoside               | 0.05 | 0.45 | 16   | 0.35 | Aqueous / Compound |
|  | Ferulic acid                           | 0.05 | 0.41 | 16   | 0.26 | Aqueous / Compound |
|  | cGMP-PKG signaling pathway             | 0.02 | 0.44 | 16   | 0.32 | KEGG               |
|  | Oxytocin signaling pathway             | 0.02 | 0.44 | 16   | 0.50 | KEGG               |
|  | AKT1                                   | 0.04 | 0.49 | 16   | 0.35 | Gene               |
|  | Adrenergic signaling in cardiomyocytes | 0.02 | 0.42 | 14.4 | 0.52 | KEGG               |
|  | Vascular smooth muscle contraction     | 0.02 | 0.42 | 14.4 | 0.42 | KEGG               |
|  | Dopaminergic synapse                   | 0.03 | 0.43 | 14.4 | 0.48 | KEGG               |
|  | HIF-1 signaling pathway                | 0.03 | 0.44 | 14.4 | 0.47 | KEGG               |
|  | GnRH signaling pathway                 | 0.03 | 0.44 | 14.4 | 0.49 | KEGG               |
|  | ErbB signaling pathway                 | 0.02 | 0.44 | 14.4 | 0.47 | KEGG               |
|  | ADCY1                                  | 0.02 | 0.44 | 14.4 | 0.42 | Gene               |
|  | Leukocyte transendothelial migration   | 0.02 | 0.43 | 12.8 | 0.37 | KEGG               |
|  | PLCG1                                  | 0.03 | 0.45 | 12.8 | 0.38 | Gene               |
|  | EGFR                                   | 0.03 | 0.48 | 12.8 | 0.36 | Gene               |
|  | Amphetamine addiction                  | 0.02 | 0.41 | 11.2 | 0.52 | KEGG               |
|  | MMP2                                   | 0.03 | 0.46 | 11.2 | 0.33 | Gene               |
|  | MMP9                                   | 0.03 | 0.46 | 11.2 | 0.34 | Gene               |
|  | ADORA1                                 | 0.04 | 0.42 | 9.6  | 0.35 | Gene               |
|  | MYL9                                   | 0.01 | 0.42 | 9.6  | 0.42 | Gene               |
|  | MYLK                                   | 0.01 | 0.42 | 9.6  | 0.45 | Gene               |
|  | p coumaric acid                        | 0.01 | 0.36 | 8    | 0.47 | Aqueous / Compound |
|  | PTK2                                   | 0.01 | 0.41 | 8    | 0.45 | Gene               |
|  | TLR4                                   | 0.01 | 0.36 | 8    | 0.49 | Gene               |
|  | PIK3CG                                 | 0.00 | 0.38 | 8    | 0.46 | Gene               |
|  | ADRA1A                                 | 0.01 | 0.41 | 8    | 0.46 | Gene               |
|  | EDNRA                                  | 0.01 | 0.41 | 8    | 0.48 | Gene               |
|  | ADRB2                                  | 0.01 | 0.41 | 8    | 0.50 | Gene               |
|  | Luteolin 7 glucoside                   | 0.01 | 0.41 | 6.4  | 0.33 | Aqueous / Compound |
|  | MAOA                                   | 0.01 | 0.42 | 6.4  | 0.40 | Gene               |
|  | MMP1                                   | 0.01 | 0.37 | 6.4  | 0.36 | Gene               |
|  | GSK3B                                  | 0.00 | 0.41 | 6.4  | 0.46 | Gene               |
|  | ACHE                                   | 0.01 | 0.41 | 6.4  | 0.41 | Gene               |
|  | CHRM2                                  | 0.02 | 0.37 | 6.4  | 0.43 | Gene               |
|  | MAOB                                   | 0.00 | 0.35 | 4.8  | 0.48 | Gene               |

---

|  |            |      |      |     |      |                       |
|--|------------|------|------|-----|------|-----------------------|
|  | PRKCD      | 0.00 | 0.35 | 4.8 | 0.52 | Gene                  |
|  | CTNNB1     | 0.00 | 0.35 | 4.8 | 0.53 | Gene                  |
|  | NOS2       | 0.00 | 0.38 | 4.8 | 0.45 | Gene                  |
|  | Hesperidin | 0.00 | 0.31 | 3.2 | 0.57 | Aqueous /<br>Compound |
|  | CFTR       | 0.00 | 0.37 | 3.2 | 0.71 | Gene                  |
|  | NFE2L2     | 0.00 | 0.34 | 3.2 | 0.59 | Gene                  |
